# Supplementary material for: Multilectin-assisted fractionation for improved single-dot tissue glycome profiling in clinical glycoproteomics
Source: Royal Society of Chemistry journal article supplement (doi:10.1039/c3mb70430k), 2013-11-12
Supplement: c3mb70430k.pdf [file c3mb70430k.pdf]

## Supporting Information

### Experiments

#### *Tissue glycoprotein extraction and lectin microarray analysis*

Archival FFPE colon sections (2.0 mm diameter and 4  $\mu\text{m}$  thickness) were purchased from Super BioChips Laboratories (Seoul, South Korea). Tissue specimens from colorectal cancer (CRC) patients with good prognosis (alive;  $n=34$ ) and poor prognosis (deceased;  $n=11$ ) were used in this study. The clinical characteristics of all subjects are provided in Suppl. Table S1.

Differential glycan profiling of tissue sections was performed as described previously.<sup>1</sup> Briefly, FFPE tissue sections were deparaffinized, and each specimen was detached from the glass slide using a needle (21 G) under a microscope. Glycoproteins were extracted, followed by fluorescence-labeling with 10  $\mu\text{g}$  of Cy3-succinidyl ester (SE; Buckinghamshire, UK). Free Cy3-SE was blocked with a probing buffer (0.5 M glycine in Tris-buffered saline containing 1% Triton X-100 (TBSTx)), the sample volume was adjusted to 200  $\mu\text{L}$ , and aliquots (30  $\mu\text{L}$ ) of Cy3-labeled glycoprotein were applied to a lectin microarray LecChip (GlycoTechnica, Yokohama, Japan). Fluorescence signals were measured on a GlycoStation Reader 1200 (GlycoTechnica), and the data were processed with Array-Pro Analyzer software (version 4.5, Media Cybernetics, Silver Spring, MD). Note that it is necessary to adjust the concentrations of Cy3-labeled protein solution empirically to obtain appropriate signal intensities. The data were analyzed using a normalization procedure after a gain-merging process.<sup>3</sup>

#### *Lectin affinity capturing*

Streptavidin-coupled magnetic beads (10  $\mu\text{L}$ , Dynabeads, Life Technologies, Carlsbad, CA) were incubated with 10  $\mu\text{L}$  biotinylated *Aleuria aurantia lectin* (AAL) or *Agaricus bisporus agglutinin* (ABA) (100 ng/ $\mu\text{L}$ , J-oil Mills, Yokohama, JP) dissolved in PBS containing 1% Triton X-100 (PBSTx) at 4  $^{\circ}\text{C}$  for 30 min with shaking ( $\times 1400$  rpm). As a control, the magnetic beads (10  $\mu\text{L}$ ) were incubated with 10  $\mu\text{L}$  PBSTx at 4  $^{\circ}\text{C}$  for 30 min with shaking ( $\times 1400$  rpm), which was referred to as "Input" for comparative analysis of the pre- and post-lectin-assisted fractionation during the following steps. The supernatants were then removed, and the beads were washed three times with 200  $\mu\text{L}$  of PBSTx. After washing, the beads were incubated with 60  $\mu\text{L}$  of the sample solution (30  $\mu\text{L}$  Cy3-labeled glycoproteins and 30  $\mu\text{L}$  probing buffer) overnight at 4  $^{\circ}\text{C}$  with shaking ( $\times 1400$  rpm). The supernatants (*i.e.*, the pass fraction: lectin(-) and Input(-)) were collected, and then applied to a LecChip.

#### *Statistical analysis*

A Mann-Whitney  $U$  test was used to compare the lectin microarray data of the two CRC groups (good prognosis vs. poor prognosis;  $p < 0.05$ ).

### References

- 1 A. Matsuda, A. Kuno, H. Ishida, T. Kawamoto, J.-i. Shoda and J. Hirabayashi, *Biochem. Biophys. Res. Commun.*, 2008, **370**, 259-263.
- 2 A. Kuno, A. Matsuda, Y. Ikehara, H. Narimatsu and J. Hirabayashi, in *Methods in Enzymology*, ed. F. Minoru, Academic Press, 2010, vol. 478, pp. 165-179.

- 3 A. Kuno, Y. Itakura, M. Toyoda, Y. Takahashi, M. Yamada, A. Umezawa and J. Hirabayashi, *J. Proteomics Bioinform*, 2008, **1**, 068-072.
