# Supplementary material for: Multilectin-assisted fractionation for improved single-dot tissue glycome profiling in clinical glycoproteomics
Source: Royal Society of Chemistry journal article supplement (doi:10.1039/c3mb70430k), 2013-11-12
Supplement: c3mb70430k_2.pdf [file c3mb70430k_2.pdf]

**Table S1 Clinical information of samples**

|                                  | <b>Good prognosis</b> | <b>Poor prognosis</b> |
|----------------------------------|-----------------------|-----------------------|
| Number of samples                | 34                    | 11                    |
| Age (median, range)              | 60 (35–78)            | 57 (36–76)            |
| <b>Organ</b>                     |                       |                       |
| <i>Ascending colon</i>           | 8                     | 2                     |
| <i>Transverse colon</i>          | 6                     | 1                     |
| <i>Descending colon</i>          | 2                     | 0                     |
| <i>Sigmoid colon</i>             | 11                    | 5                     |
| <i>Rectum</i>                    | 4                     | 2                     |
| <i>Cecum</i>                     | 3                     | 1                     |
| <b>Diagnosis</b>                 |                       |                       |
| <i>Well differentiated</i>       | 9                     | 2                     |
| <i>Moderately differentiated</i> | 24                    | 9                     |
| <i>Poorly differentiated</i>     | 1                     | 0                     |
| <b>Stage</b>                     |                       |                       |
| <i>II</i>                        | 20                    | 3                     |
| <i>III</i>                       | 14                    | 5                     |
| <i>IV</i>                        | 0                     | 3                     |
