# Supplementary material for: Multilectin-assisted fractionation for improved single-dot tissue glycome profiling in clinical glycoproteomics
Source: Royal Society of Chemistry journal article supplement (doi:10.1039/c3mb70430k), 2013-11-12
Supplement: c3mb70430k_3.pdf [file c3mb70430k_3.pdf]

**Table S2 The abbreviations and carbohydrate specificities of 45 lectins of LecChip used in this study.**

| Lectins             | Origin                             | Binding specificity                                                                |
|---------------------|------------------------------------|------------------------------------------------------------------------------------|
| LTL                 | <i>Lotus tetragonolobus</i>        | Fuc $\alpha$ 1-3 GlcNAc, Sia-Le <sup>x</sup> and Le <sup>x</sup>                   |
| PSA                 | <i>Pisum sativum</i>               | Fuc $\alpha$ 1-6 GlcNAc and $\alpha$ -Man                                          |
| LCA                 | <i>Lens culinaris</i>              | Fuc $\alpha$ 1-6 GlcNAc and $\alpha$ -Man, $\alpha$ -Glc                           |
| UEA-I               | <i>Ulex europaeus</i>              | Fuc $\alpha$ 1-2 LacNAc                                                            |
| AOL                 | <i>Aspergillus oryzae</i>          | Terminal $\alpha$ Fuc and $\pm$ Sia-Le <sup>x</sup>                                |
| AAL                 | <i>Aleuria aurantia</i>            | Terminal $\alpha$ Fuc and $\pm$ Sia-Le <sup>x</sup>                                |
| MAL                 | <i>Maackia amurensis</i>           | Sia $\alpha$ 2-3 Gal                                                               |
| SNA                 | <i>Sambucus nigra</i>              | Sia $\alpha$ 2-6 Gal/GalNAc                                                        |
| SSA                 | <i>Sambucus sieboldiana</i>        | Sia $\alpha$ 2-6 Gal/GalNAc                                                        |
| TJA-I               | <i>Trichosanthes japonica</i>      | Sia $\alpha$ 2-6 Gal $\beta$ 1-4 GlcNAc $\beta$ -R                                 |
| PHA(L)              | <i>Phaseolus vulgaris</i>          | Tri- and tetra-antennary complex oligosaccharides                                  |
| ECA                 | <i>Erythrina cristagalli</i>       | Lac/LacNAc                                                                         |
| RCA120              | <i>Ricinus communis</i>            | Lac/LacNAc                                                                         |
| PHA(E)              | <i>Phaseolus vulgaris</i>          | NA <sub>2</sub> and bisecting GlcNAc                                               |
| DSA                 | <i>Datura stramonium</i>           | (GlcNAc) <sub>n</sub> , polyLacNAc and LacNAc (NA <sub>3</sub> , NA <sub>4</sub> ) |
| GSL-II              | <i>Griffonia simplicifolia</i>     | Agalactosylated N-glycan                                                           |
| NPA                 | <i>Narcissus pseudonarcissus</i>   | non-substituted $\alpha$ 1-6 Man                                                   |
| ConA                | <i>Canavalia ensiformis</i>        | $\alpha$ -Man (inhibited by presence of bisecting GlcNAc)                          |
| GNA                 | <i>Galanthus nivalis</i>           | non-substituted $\alpha$ 1-6 Man                                                   |
| HHL                 | <i>Hippeastrum hybrid</i>          | non-substituted $\alpha$ 1-6 Man                                                   |
| ACG                 | <i>Agroclype cylindracea</i>       | Sia $\alpha$ 2-3 Gal $\beta$ 1-4GlcNAc                                             |
| TxLC-I              | <i>Tulipa gesneriana</i>           | Man <sub>3</sub> core, bi- and tri-antennary complex-type N-glycan, GalNAc         |
| BPL                 | <i>Bauhinia purpurea alba</i>      | Gal $\beta$ 1-3 GalNAc and NA <sub>3</sub> , NA <sub>4</sub>                       |
| TJA-II              | <i>Trichosanthes japonica</i>      | Fuc $\alpha$ 1-2 Gal, $\beta$ -GalNAc > NA <sub>3</sub> , NA <sub>4</sub>          |
| EEL                 | <i>Euonymus europaeus</i>          | Gal $\alpha$ 1-3 [Fuc $\alpha$ 1-2Gal] > Gal $\alpha$ 1-3Gal                       |
| ABA                 | <i>Agaricus bisporus</i>           | Gal $\beta$ 1-3 GalNAc $\alpha$ -Thr/Ser (T) and sialyl-T                          |
| LEL                 | <i>Lycopersicon esculentum</i>     | (GlcNAc) <sub>n</sub> and polyLacNAc                                               |
| STL                 | <i>Solanum tuberosum</i>           | (GlcNAc) <sub>n</sub> and polyLacNAc                                               |
| UDA                 | <i>Urtica dioica</i>               | (GlcNAc) <sub>n</sub> and polyLacNAc                                               |
| PWM                 | <i>Phytolacca americana</i>        | (GlcNAc) <sub>n</sub> and polyLacNAc                                               |
| Jacalin             | <i>Artocarpus integrifolia</i>     | Gal $\beta$ 1-3 GalNAc $\alpha$ -Thr/Ser (T) and GalNAc $\alpha$ -Thr/Ser (Tn)     |
| PNA                 | <i>Arachis hypogaea</i>            | Gal $\beta$ 1-3 GalNAc $\alpha$ -Thr/Ser (T)                                       |
| WFA                 | <i>Wisteria floribunda</i>         | Terminal GalNAc (e.g., GalNAc $\beta$ 1-4GlcNAc)                                   |
| ACA                 | <i>Amaranthus caudatus</i>         | Gal $\beta$ 1-3 GalNAc $\alpha$ -Thr/Ser (T)                                       |
| MPA                 | <i>Maclura pomifera</i>            | Gal $\beta$ 1-3 GalNAc $\alpha$ -Thr/Ser (T) and GalNAc $\alpha$ -Thr/Ser (Tn)     |
| HPA                 | <i>Helix pomatia</i>               | Terminal GalNAc                                                                    |
| VVA                 | <i>Vicia villosa</i>               | $\alpha$ -, $\beta$ -linked terminal GalNAc and GalNAc $\alpha$ -Thr/Ser (Tn)      |
| DBA                 | <i>Dolichos biflorus</i>           | GalNAc $\alpha$ -Thr/Ser (Tn) and GalNAc $\alpha$ 1-3 GalNAc                       |
| SBA                 | <i>Glycine max</i>                 | Terminal GalNAc (especially GalNAc $\alpha$ 1-3 Gal)                               |
| Calsepa             | <i>Calystegia sepium</i>           | Man, Maltose                                                                       |
| PTL-I               | <i>Psophocarpus tetragonolobus</i> | $\alpha$ -GalNAc and Gal                                                           |
| MAH                 | <i>Maackia amurensis</i>           | Sia $\alpha$ 2-3Gal $\beta$ 1-3[Sia $\alpha$ 2-6 GalNAc] $\alpha$ -R               |
| WGA                 | <i>Triticum unlgaris</i>           | (GlcNAc) <sub>n</sub> and multivalent Sia                                          |
| GSL-IA <sub>4</sub> | <i>Griffonia simplicifolia</i>     | $\alpha$ -GalNAc, GalNAc $\alpha$ -Thr/Ser (Tn)                                    |
| GSL-IB <sub>4</sub> | <i>Griffonia simplicifolia</i>     | $\alpha$ -Gal                                                                      |

Data are LfDB (Lectin frontier Database; <http://riodb.ibase.aist.go.jp/rcmg/glycodb/LectinSearch>).
