# Supplementary material for: Multilectin-assisted fractionation for improved single-dot tissue glycome profiling in clinical glycoproteomics
Source: Royal Society of Chemistry journal article supplement (doi:10.1039/c3mb70430k), 2013-11-12
Supplement: c3mb70430k_4.pdf [file c3mb70430k_4.pdf]

Table S3-1 Statistical analysis result of all of lectins between CRC patients with good and poor prognoses.

|         | Good prognosis (n=34) | Poor prognosis (n=11) | p            | Good prognosis |          |          |          |          |       |          |          |          |          |          |          |          |          |          |          |          |          |          |          |          |
|---------|-----------------------|-----------------------|--------------|----------------|----------|----------|----------|----------|-------|----------|----------|----------|----------|----------|----------|----------|----------|----------|----------|----------|----------|----------|----------|----------|
|         |                       |                       |              | 1              | 2        | 3        | 4        | 5        | 6     | 7        | 8        | 9        | 10       | 11       | 12       | 13       | 14       | 15       | 16       | 17       | 18       | 19       | 20       | 21       |
| LTL     | 0.03                  | 0.03                  | 0.978        | 0.038217       | 0.066116 | 0.036254 | 0.068182 | 0        | 0     | 0        | 0        | 0.058621 | 0        | 0        | 0        | 0.055762 | 0.038012 | 0.054054 | 0.074675 | 0.037037 | 0        | 0        | 0.176583 | 0.047431 |
| PSA     | 0.20                  | 0.21                  | 0.492        | 0.237792       | 0.360882 | 0.250755 | 0.378788 | 0.289855 | 0.12  | 0.172414 | 0.217532 | 0.196552 | 0.171103 | 0.211382 | 0.1      | 0.184015 | 0.181287 | 0.262162 | 0.232143 | 0.217865 | 0.152416 | 0.269795 | 0.216891 | 0.166008 |
| LCA     | 0.22                  | 0.22                  | 0.535        | 0.250531       | 0.352617 | 0.287009 | 0.371212 | 0.26087  | 0.15  | 0.198276 | 0.214286 | 0.231034 | 0.174905 | 0.223577 | 0.154054 | 0.245353 | 0.166667 | 0.210811 | 0.230519 | 0.217865 | 0.156134 | 0.266862 | 0.170825 | 0.205534 |
| UEA-I   | 0.00                  | 0.05                  | 0.175        | 0              | 0.041322 | 0.063444 | 0        | 0        | 0.065 | 0        | 0.038961 | 0        | 0        | 0        | 0.026022 | 0.105263 | 0        | 0.285714 | 0.084967 | 0        | 0        | 0.289827 | 0.039526 |          |
| AOL     | 0.74                  | 0.55                  | 0.081        | 0.760085       | 0.807163 | 0.867069 | 0.856061 | 0.78744  | 0.52  | 0.775862 | 0.824675 | 0.893103 | 0.642586 | 0.711382 | 0.624324 | 0.581784 | 0.760234 | 0.751351 | 0.899351 | 0.786492 | 0.70632  | 0.478006 | 1.105566 | 0.86166  |
| AAL     | 0.75                  | 0.56                  | <b>0.006</b> | 0.66242        | 0.625344 | 0.903323 | 0.825758 | 0.816425 | 0.755 | 0.883621 | 0.876623 | 0.806897 | 0.714829 | 0.768293 | 0.77027  | 0.475836 | 0.687135 | 0.678378 | 0.818182 | 0.747277 | 0.765799 | 0.521994 | 1.005758 | 0.893281 |
| MAL     | 0.01                  | 0.06                  | 0.164        | 0.03397        | 0.027548 | 0.030211 | 0        | 0        | 0     | 0        | 0.04943  | 0        | 0        | 0        | 0.050186 | 0        | 0.035135 | 0.100649 | 0.082789 | 0        | 0.055718 | 0.040307 | 0.075099 |          |
| SNA     | 0.50                  | 0.50                  | 0.958        | 0.469214       | 0.46281  | 0.697885 | 0.465909 | 0.652174 | 0.525 | 0.405172 | 0.496753 | 0.482759 | 0.574144 | 0.601626 | 0.594595 | 0.481413 | 0.511696 | 0.483784 | 0.423701 | 0.559913 | 0.472119 | 0.442815 | 0.523992 | 0.600791 |
| SSA     | 0.54                  | 0.54                  | 0.597        | 0.467091       | 0.506887 | 0.767372 | 0.625    | 0.681159 | 0.515 | 0.469828 | 0.548701 | 0.62069  | 0.543726 | 0.422764 | 0.605405 | 0.533457 | 0.508772 | 0.540541 | 0.498377 | 0.603486 | 0.490706 | 0.498534 | 0.545106 | 0.675889 |
| TJA-I   | 0.81                  | 0.77                  | 0.328        | 0.70913        | 0.812672 | 1.166163 | 0.80303  | 1.014493 | 0.785 | 0.668103 | 0.86039  | 0.796552 | 0.790875 | 1.012195 | 0.913514 | 0.912639 | 0.871345 | 0.894595 | 0.792208 | 0.810458 | 0.710037 | 0.791789 | 0.944338 | 0.992095 |
| PHA-L   | 0.04                  | 0.06                  | 0.270        | 0.029724       | 0.038567 | 0.069486 | 0.041667 | 0.048309 | 0     | 0        | 0        | 0.065517 | 0.079848 | 0        | 0.089189 | 0        | 0.032164 | 0        | 0.133117 | 0.061002 | 0.05948  | 0.035191 | 0.067179 | 0.051383 |
| ECA     | 0.05                  | 0.06                  | 0.264        | 0.046709       | 0.082645 | 0.048338 | 0.083333 | 0        | 0     | 0.051724 | 0.035714 | 0.117241 | 0        | 0.065041 | 0.027027 | 0.065056 | 0.038012 | 0.054054 | 0.141234 | 0.056645 | 0        | 0.029326 | 0.049904 | 0.043478 |
| RCA120  | 0.33                  | 0.31                  | 0.853        | 0.350318       | 0.418733 | 0.36858  | 0.162879 | 0.376812 | 0.22  | 0.206897 | 0.266234 | 0.227586 | 0.178707 | 0.357724 | 0.410811 | 0.254647 | 0.450292 | 0.37027  | 0.50974  | 0.525054 | 0.30855  | 0.258065 | 0.332054 | 0.347826 |
| PHA-E   | 0.24                  | 0.29                  | 0.170        | 0.193206       | 0.264463 | 0.380665 | 0.246212 | 0.251208 | 0.195 | 0.168103 | 0.24026  | 0.227586 | 0.26616  | 0.239837 | 0.324324 | 0.213755 | 0.353801 | 0.216216 | 0.37013  | 0.309368 | 0.252788 | 0.269795 | 0.178503 | 0.16996  |
| GSL-II  | 0.00                  | 0.00                  | 0.416        | 0              | 0        | 0        | 0        | 0        | 0     | 0        | 0        | 0        | 0        | 0        | 0        | 0        | 0        | 0        | 0.045455 | 0        | 0        | 0        | 0        | 0        |
| NPA     | 0.09                  | 0.13                  | 0.178        | 0.138004       | 0.055096 | 0.172205 | 0.223485 | 0.096618 | 0.1   | 0.056034 | 0.048701 | 0.058621 | 0.068441 | 0        | 0.040541 | 0.053903 | 0.122807 | 0.164865 | 0.152597 | 0.074074 | 0.063197 | 0.082111 | 0.184261 | 0.142292 |
| ConA    | 0.35                  | 0.36                  | 0.635        | 0.29724        | 0.38292  | 0.410876 | 0.568182 | 0.425121 | 0.415 | 0.465517 | 0.396104 | 0.531034 | 0.205323 | 0.191057 | 0.175676 | 0.336431 | 0.292398 | 0.359459 | 0.306818 | 0.302832 | 0.345725 | 0.360704 | 0.366603 | 0.501976 |
| GNA     | 0.10                  | 0.13                  | 0.126        | 0.138004       | 0.184573 | 0.1571   | 0.276515 | 0.135266 | 0.085 | 0.073276 | 0.074675 | 0.068966 | 0.057034 | 0.081301 | 0        | 0.074349 | 0.102339 | 0.167568 | 0.188312 | 0.100218 | 0.092937 | 0.099707 | 0.153551 | 0.12253  |
| HHL     | 0.10                  | 0.08                  | 0.801        | 0.14862        | 0.146006 | 0.129909 | 0.155303 | 0.193237 | 0     | 0.081897 | 0.081169 | 0        | 0        | 0.113821 | 0        | 0.046468 | 0.128655 | 0.145946 | 0.160714 | 0.087146 | 0.040892 | 0.079179 | 0.128599 | 0.039526 |
| ACG     | 0.20                  | 0.20                  | 0.460        | 0.205945       | 0.250689 | 0.181269 | 0.147727 | 0.222222 | 0.125 | 0.125    | 0.12013  | 0.137931 | 0.08365  | 0.341463 | 0.208108 | 0.239777 | 0.277778 | 0.235135 | 0.217532 | 0.281046 | 0.148699 | 0.258065 | 0.162142 | 0.217391 |
| TxLC-I  | 0.04                  | 0.06                  | 0.646        | 0.031847       | 0.07438  | 0.099698 | 0.056818 | 0        | 0     | 0        | 0.038961 | 0        | 0        | 0        | 0.039033 | 0.087719 | 0        | 0.13474  | 0.104575 | 0        | 0.043988 | 0.099808 | 0        | 0        |
| BPL     | 0.12                  | 0.10                  | 0.428        | 0.193206       | 0.23416  | 0.087613 | 0.193182 | 0.111111 | 0.065 | 0.107759 | 0.13961  | 0.072414 | 0.038023 | 0.069106 | 0.140541 | 0.100372 | 0.163743 | 0.12973  | 0.167208 | 0.252723 | 0.182156 | 0.105572 | 0.163148 | 0.098814 |
| TJA-II  | 0.15                  | 0.19                  | 0.444        | 0.169851       | 0.115702 | 0.145015 | 0.064394 | 0.130435 | 0.15  | 0.060345 | 0.172078 | 0.082759 | 0.148289 | 0.138211 | 0.202703 | 0.092937 | 0.172515 | 0.121622 | 0.332792 | 0.250545 | 0.144981 | 0.087977 | 0.239923 | 0.098814 |
| EEL     | 0.00                  | 0.00                  | 0.235        | 0              | 0        | 0        | 0        | 0        | 0     | 0        | 0        | 0        | 0        | 0        | 0        | 0        | 0        | 0        | 0.029221 | 0.03268  | 0        | 0        | 0.03263  | 0        |
| ABA     | 0.17                  | 0.23                  | <b>0.037</b> | 0.216561       | 0.146006 | 0.256798 | 0.276515 | 0.164251 | 0.215 | 0.172414 | 0.262987 | 0.110345 | 0.076046 | 0.073171 | 0.102703 | 0.171004 | 0.163743 | 0.2      | 0.206169 | 0.163399 | 0.193309 | 0.202346 | 0.395393 | 0.047431 |
| LEL     | 1.01                  | 1.02                  | 0.926        | 1.112527       | 1.349862 | 0.848943 | 1.151515 | 1.429952 | 1.28  | 1.202586 | 1.006494 | 1.006897 | 0.532319 | 0.99187  | 0.891892 | 0.973978 | 1.040936 | 1.113514 | 0.912338 | 0.989107 | 0.936803 | 1.061584 | 0.761996 | 1        |
| STL     | 0.75                  | 0.69                  | 0.383        | 0.772824       | 0.950413 | 0.595166 | 1.007576 | 1.236715 | 0.805 | 0.806034 | 0.87013  | 0.817241 | 0.505703 | 1.036585 | 0.513514 | 0.566914 | 0.883041 | 0.843243 | 0.519481 | 0.616558 | 0.680297 | 0.68915  | 0.627639 | 0.727273 |
| UDA     | 0.76                  | 0.75                  | 0.544        | 0.779193       | 0.760331 | 0.870091 | 0.935606 | 1.101449 | 0.835 | 1.012931 | 0.938312 | 0.844828 | 0.513308 | 1.073171 | 0.518919 | 0.66171  | 0.719298 | 0.875676 | 0.506494 | 0.623094 | 0.713755 | 0.756598 | 0.923225 | 0.743083 |
| PWM     | 0.14                  | 0.16                  | 0.146        | 0.163482       | 0.245179 | 0.1571   | 0.219697 | 0.183575 | 0.17  | 0.073276 | 0.068182 | 0.113793 | 0.091255 | 0.105691 | 0.135135 | 0.159851 | 0.190058 | 0.245946 | 0.118506 | 0.08061  | 0.211896 | 0.117302 | 0.274472 | 0.241107 |
| Jacalin | 0.23                  | 0.24                  | 0.154        | 0.242038       | 0.267218 | 0.283988 | 0.32197  | 0.236715 | 0.235 | 0.202586 | 0.409091 | 0.182759 | 0.08365  | 0.243902 | 0.1      | 0.144981 | 0.277778 | 0.27027  | 0.165584 | 0.180828 | 0.208178 | 0.225806 | 0.224568 | 0        |
| PNA     | 0.00                  | 0.00                  | 0.079        | 0              | 0        | 0        | 0        | 0        | 0     | 0        | 0        | 0        | 0        | 0        | 0        | 0        | 0        | 0        | 0        | 0        | 0        | 0        | 0        | 0        |
| WFA     | 0.05                  | 0.08                  | 0.219        | 0.084926       | 0.052342 | 0.054381 | 0        | 0        | 0     | 0        | 0.048701 | 0.051724 | 0        | 0.044715 | 0.072973 | 0.02974  | 0.049708 | 0.062162 | 0.211039 | 0.106754 | 0        | 0.035191 | 0.103647 | 0        |
| ACA     | 0.14                  | 0.14                  | 0.721        | 0.135881       | 0.066116 | 0.187311 | 0.109848 | 0.193237 | 0     | 0.112069 | 0.266234 | 0.086207 | 0.064639 | 0.085366 | 0.251351 | 0.057621 | 0.239766 | 0.164865 | 0.136364 | 0.381264 | 0.245353 | 0.155425 | 0.303263 | 0.106719 |
| MPA     | 0.03                  | 0.05                  | 0.175        | 0.070064       | 0.027548 | 0.048338 | 0.041667 | 0        | 0     | 0        | 0.064935 | 0        | 0        | 0        | 0        | 0.024164 | 0.046784 | 0.064865 | 0.087662 | 0.023965 | 0        | 0.046921 | 0.086372 | 0        |
| HPA     | 0.00                  | 0.04                  | 0.402        | 0              | 0        | 0.045317 | 0.041667 | 0        | 0.095 | 0        | 0        | 0        | 0        | 0.044715 | 0        | 0        | 0        | 0        | 0        | 0        | 0        | 0.052786 | 0.205374 | 0.059289 |
| VVA     | 0.00                  | 0.00                  | 0.397        | 0              | 0.057851 | 0        | 0        | 0        | 0     | 0        | 0        | 0        | 0        | 0        | 0        | 0        | 0        | 0        | 0        | 0        | 0        | 0        | 0        | 0        |
| DBA     | 0.00                  | 0.00                  | 0.450        | 0              | 0.041322 | 0        | 0        | 0        | 0     | 0        | 0        | 0.034483 | 0        | 0        | 0        | 0        | 0        | 0        | 0        | 0        | 0        | 0        | 0.18618  | 0        |
| SBA     | 0.00                  | 0.00                  | 0.246        | 0              | 0.046832 | 0        | 0        | 0        | 0     | 0        | 0        | 0        | 0        | 0        | 0        | 0        | 0        | 0        | 0.034091 | 0        | 0        | 0        | 0        | 0        |
| Calsepa | 0.27                  | 0.28                  | 0.492        | 0.295117       | 0.349862 | 0.416918 | 0.537879 | 0.352657 | 0.175 | 0.349138 | 0.318182 | 0.262069 | 0.091255 | 0.325203 | 0.175676 | 0.310409 | 0.195906 | 0.310811 | 0.251623 | 0.248366 | 0.178439 | 0.28739  | 0.245681 | 0.233202 |
| PTL-I   | 0.00                  | 0.00                  | 0.375        | 0              | 0.027548 | 0        | 0        | 0        | 0     | 0        | 0        | 0        | 0        | 0        | 0        | 0        | 0        | 0        | 0        | 0        | 0        | 0        | 0        | 0        |
| MAH     | 0.07                  | 0.06                  | 0.340        | 0.072187       | 0.07438  | 0.048338 | 0.049242 | 0        | 0.055 | 0        | 0.103896 | 0.068966 | 0.041825 | 0.056911 | 0        | 0.066914 | 0.093567 | 0.075676 | 0.029221 | 0.119826 | 0.137546 | 0.111437 | 0.042226 | 0        |
| WGA     | 0.39                  | 0.39                  | 0.833        | 0.369427       | 0.316804 | 0.586103 | 0.439394 | 0.483092 | 0.315 | 0.383621 | 0.522727 | 0.413793 | 0.285171 | 0.53252  | 0.345946 | 0.243494 | 0.383041 | 0.424324 | 0.323052 | 0.394336 | 0.33829  | 0.392962 | 0.464491 | 0.15415  |
| GSL-IA4 | 0.00                  | 0.00                  | 0.669        | 0              | 0        | 0        | 0        | 0        | 0     | 0        | 0        | 0        | 0        | 0        | 0        | 0        | 0        | 0        | 0        | 0        | 0        | 0        | 0.034549 | 0        |
| GSL-IB4 | 0.00                  | 0.00                  | 0.079        | 0              | 0        | 0        | 0        | 0        | 0     | 0        | 0        | 0        | 0        | 0        | 0        | 0        | 0        | 0        | 0        | 0        | 0        | 0        | 0        | 0        |

The values were presented as the median after gain-merging and DSA-normalization.  
 Mann-Whitney U test was used for statistical analysis.

**Table S3-2 Statistical analysis result of all of lectins between CRC patients with good and poor prognoses.**

|         | Good prognosis |          |          |          |          |          |          |          |          |          |          |          |          |          | Poor prognosis |        |          |          |          |          |          |          |          |          |  |
|---------|----------------|----------|----------|----------|----------|----------|----------|----------|----------|----------|----------|----------|----------|----------|----------------|--------|----------|----------|----------|----------|----------|----------|----------|----------|--|
|         | 22             | 23       | 24       | 25       | 26       | 27       | 28       | 29       | 30       | 31       | 32       | 33       | 34       | 1        | 2              | 3      | 4        | 5        | 6        | 7        | 8        | 9        | 10       | 11       |  |
| LTL     | 0.056711       | 0        | 0        | 0.177481 | 0.023474 | 0        | 0.063265 | 0        | 0        | 0.032448 | 0.033493 | 0        | 0        | 0.03937  | 0.267943       | 0      | 0.031863 | 0        | 0        | 0        | 0        | 0.075581 | 0.027027 | 0.043478 |  |
| PSA     | 0.221172       | 0.307143 | 0.144578 | 0.234733 | 0.183099 | 0.165517 | 0.2      | 0.083019 | 0.164474 | 0.187316 | 0.143541 | 0.165109 | 0.27027  | 0.238845 | 0.325359       | 0.1888 | 0.218137 | 0.212766 | 0.246032 | 0.196281 | 0.278607 | 0.212209 | 0.116424 | 0.146245 |  |
| LCA     | 0.124764       | 0.378571 | 0.172691 | 0.274809 | 0.220657 | 0.151724 | 0.228571 | 0.109434 | 0.085526 | 0.182891 | 0.130781 | 0.221184 | 0.328185 | 0.209974 | 0.354067       | 0.1744 | 0.237745 | 0.244681 | 0.253968 | 0.200413 | 0.243781 | 0.219477 | 0.162162 | 0.205534 |  |
| UEA-I   | 0.236295       | 0        | 0.056225 | 0.301527 | 0        | 0        | 0.059184 | 0        | 0        | 0.179941 | 0.065391 | 0        | 0        | 0.076115 | 0.130781       | 0.016  | 0.036765 | 0.079787 | 0.079365 | 0.07438  | 0        | 0.046512 | 0.04158  | 0        |  |
| AOL     | 0.722117       | 1.664286 | 0.674699 | 1.244275 | 0.516432 | 0.644828 | 0.787755 | 0.667925 | 0.493421 | 0.40708  | 0.358852 | 0.417445 | 0.525097 | 0.75853  | 0.858054       | 0.3152 | 0.45098  | 0.707447 | 0.765873 | 0.545455 | 0.751244 | 0.472384 | 0.50104  | 0.505929 |  |
| AAL     | 0.992439       | 1.528571 | 0.698795 | 1.122137 | 0.467919 | 0.727586 | 0.810204 | 0.713208 | 0.506579 | 0.501475 | 0.408293 | 0.436137 | 0.548263 | 0.708661 | 0.61244        | 0.3104 | 0.419118 | 0.611702 | 0.706349 | 0.561983 | 0.78607  | 0.388081 | 0.536383 | 0.482213 |  |
| MAL     | 0              | 0        | 0        | 0.028626 | 0.035994 | 0        | 0.034694 | 0        | 0        | 0.026549 | 0.122807 | 0        | 0.042471 | 0        | 0.057416       | 0.0592 | 0.061275 | 0        | 0.055556 | 0.028926 | 0        | 0.114826 | 0.079002 | 0        |  |
| SNA     | 0.534972       | 0.542857 | 0.763052 | 0.509542 | 0.488263 | 0.548276 | 0.497959 | 0.4      | 0.480263 | 0.359882 | 0.437002 | 0.545171 | 0.521236 | 0.464567 | 0.497608       | 0.4432 | 0.534314 | 0.664894 | 0.559524 | 0.36157  | 0.567164 | 0.5      | 0.440748 | 0.55336  |  |
| SSA     | 0.544423       | 0.664286 | 0.767068 | 0.580153 | 0.543036 | 0.617241 | 0.6      | 0.411321 | 0.513158 | 0.376106 | 0.454545 | 0.570093 | 0.598456 | 0.519685 | 0.542265       | 0.4496 | 0.546569 | 0.728723 | 0.619048 | 0.378099 | 0.597015 | 0.434593 | 0.449064 | 0.652174 |  |
| TJA-I   | 0.744802       | 0.964286 | 1.068273 | 0.984733 | 0.876369 | 0.934483 | 0.783673 | 0.664151 | 0.723684 | 0.556047 | 0.763955 | 0.856698 | 0.764479 | 0.753281 | 0.885167       | 0.7024 | 0.759804 | 0.989362 | 0.896825 | 0.599174 | 0.905473 | 0.545058 | 0.773389 | 0.936759 |  |
| PHA-L   | 0.034026       | 0        | 0        | 0.03626  | 0.062598 | 0.034483 | 0.083673 | 0        | 0        | 0.050147 | 0.076555 | 0        | 0        | 0.057743 | 0.100478       | 0.08   | 0.058824 | 0        | 0.063492 | 0.068182 | 0        | 0.174419 | 0.027027 | 0        |  |
| ECA     | 0              | 0        | 0.040161 | 0.141221 | 0.112676 | 0.062069 | 0.1      | 0        | 0        | 0.041298 | 0.180223 | 0        | 0.057915 | 0.047244 | 0.253589       | 0.0864 | 0.061275 | 0.069149 | 0.103175 | 0.047521 | 0        | 0.223837 | 0.037422 | 0        |  |
| RCA120  | 0.457467       | 0.128571 | 0.26506  | 0.183206 | 0.4241   | 0.410345 | 0.47551  | 0.328302 | 0.157895 | 0.277286 | 0.607656 | 0.186916 | 0.266409 | 0.475066 | 0.30622        | 0.4352 | 0.343137 | 0.239362 | 0.210317 | 0.291322 | 0.228856 | 0.402616 | 0.386694 | 0.300395 |  |
| PHA-E   | 0.160681       | 0.135714 | 0.160643 | 0.14313  | 0.355243 | 0.358621 | 0.291837 | 0.188679 | 0.177632 | 0.275811 | 0.363636 | 0.277259 | 0.243243 | 0.254593 | 0.232855       | 0.3408 | 0.321078 | 0.297872 | 0.293651 | 0.256198 | 0.243781 | 0.561047 | 0.316008 | 0.083004 |  |
| GSL-II  | 0              | 0        | 0        | 0        | 0        | 0        | 0        | 0        | 0        | 0        | 0        | 0        | 0        | 0        | 0              | 0      | 0        | 0        | 0        | 0        | 0        | 0.039244 | 0        | 0        |  |
| NPA     | 0.206049       | 0        | 0.116466 | 0.089695 | 0.057903 | 0.062069 | 0.14898  | 0.056604 | 0.072368 | 0.196165 | 0.14992  | 0.049844 | 0.150579 | 0.262467 | 0.111643       | 0.176  | 0.102941 | 0.12766  | 0.242063 | 0.128099 | 0.089552 | 0.148256 | 0.056133 | 0.055336 |  |
| ConA    | 0.253308       | 0.542857 | 0.385542 | 0.46374  | 0.230047 | 0.310345 | 0.293878 | 0.215094 | 0.802632 | 0.235988 | 0.320574 | 0.28972  | 0.505792 | 0.288714 | 0.599681       | 0.2176 | 0.357843 | 0.606383 | 0.595238 | 0.376033 | 0.358209 | 0.180233 | 0.268191 | 0.616601 |  |
| GNA     | 0.224953       | 0.078571 | 0.088353 | 0.116412 | 0.087637 | 0.072414 | 0.128571 | 0.086792 | 0.072368 | 0.240413 | 0.114833 | 0.096573 | 0.11583  | 0.207349 | 0.154705       | 0.192  | 0.105392 | 0.132979 | 0.194444 | 0.123967 | 0.094527 | 0.159884 | 0.058212 | 0.090909 |  |
| HHL     | 0.289225       | 0        | 0.11245  | 0.097328 | 0.095462 | 0        | 0.17551  | 0.10566  | 0        | 0.250737 | 0.102073 | 0.05919  | 0.073359 | 0.267717 | 0.08453        | 0.1296 | 0.07598  | 0        | 0.107143 | 0.152893 | 0.079602 | 0.164244 | 0.373422 | 0.063241 |  |
| ACG     | 0.049149       | 0.092857 | 0.188755 | 0.110687 | 0.236307 | 0.265517 | 0.112245 | 0.135849 | 0.098684 | 0.100295 | 0.244019 | 0.227414 | 0.289575 | 0.15748  | 0.14992        | 0.208  | 0.352941 | 0.18617  | 0.202381 | 0.157025 | 0.223881 | 0.232558 | 0.259872 | 0.130435 |  |
| TxLC-I  | 0.128544       | 0        | 0        | 0.043893 | 0.114241 | 0.1      | 0.116327 | 0        | 0        | 0.137168 | 0.106858 | 0.096573 | 0.057915 | 0.089239 | 0.036683       | 0.0624 | 0.066176 | 0.053191 | 0.059524 | 0.02686  | 0        | 0.140988 | 0.079002 | 0        |  |
| BPL     | 0.217391       | 0        | 0        | 0.09542  | 0.319249 | 0.341379 | 0.367347 | 0.184906 | 0        | 0.066372 | 0.251994 | 0.05296  | 0        | 0.254593 | 0.100478       | 0.0912 | 0.071078 | 0        | 0.130952 | 0.043388 | 0.099502 | 0.373547 | 0.137214 | 0        |  |
| TJA-II  | 0.215501       | 0        | 0.156627 | 0.177481 | 0.28795  | 0.351724 | 0.212245 | 0.101887 | 0.085526 | 0.19764  | 0.354067 | 0.196262 | 0.104247 | 0.238845 | 0.135566       | 0.2352 | 0.169118 | 0.132979 | 0.198413 | 0.18595  | 0.064677 | 0.318314 | 0.264033 | 0.079051 |  |
| EEL     | 0              | 0        | 0        | 0        | 0.043818 | 0        | 0        | 0        | 0        | 0        | 0.015949 | 0        | 0        | 0        | 0              | 0      | 0.036765 | 0        | 0.059524 | 0        | 0        | 0.267442 | 0        | 0        |  |
| ABA     | 0.160681       | 0.157143 | 0.590361 | 0.116412 | 0.239437 | 0.62069  | 0.155102 | 0.083019 | 0.171053 | 0.112094 | 0.287081 | 0.423676 | 0.258687 | 0.223097 | 0.213716       | 0.2144 | 0.230392 | 0.228723 | 0.253968 | 0.252066 | 0.199005 | 0.402616 | 0.284823 | 0.205534 |  |
| LEL     | 0.928166       | 1.264286 | 1.293173 | 0.662214 | 0.862285 | 1.117241 | 0.910204 | 1.154717 | 1.269737 | 0.961652 | 1.027113 | 0.956386 | 1.393822 | 1.115486 | 1.015949       | 0.9536 | 1.242647 | 1.234043 | 0.880952 | 0.942149 | 1.21393  | 0.706395 | 1.039501 | 1        |  |
| STL     | 0.500945       | 1.264286 | 0.875502 | 0.51145  | 0.564945 | 0.962069 | 0.522449 | 0.70566  | 1.105263 | 0.784661 | 0.591707 | 0.70405  | 0.822394 | 0.87664  | 0.575758       | 0.5216 | 0.686275 | 0.792553 | 0.797619 | 0.561983 | 0.840796 | 0.405523 | 0.681913 | 0.818182 |  |
| UDA     | 0.485822       | 1.45     | 1.096386 | 0.751908 | 0.57277  | 0.786207 | 0.681633 | 0.833962 | 0.578947 | 0.488201 | 0.551834 | 0.5919   | 0.938224 | 0.84252  | 0.548644       | 0.5056 | 0.647059 | 0.888298 | 0.873016 | 0.75     | 1.134328 | 0.398256 | 0.511435 | 0.885375 |  |
| PWM     | 0.090737       | 0.1      | 0.136546 | 0.114504 | 0.156495 | 0.134483 | 0.130612 | 0.098113 | 0        | 0.159292 | 0.169059 | 0        | 0.243243 | 0.262467 | 0.162679       | 0.128  | 0.193627 | 0.292553 | 0.551587 | 0.134298 | 0.144279 | 0.297965 | 0.101871 | 0.063241 |  |
| Jacalin | 0.066163       | 0.2      | 0.253012 | 0.152672 | 0.266041 | 0.772414 | 0.163265 | 0.086792 | 0.190789 | 0.172566 | 0.37799  | 0.470405 | 0.250965 | 0.233596 | 0.194577       | 0.1936 | 0.245098 | 0.281915 | 0.365079 | 0.214876 | 0.21393  | 0.422965 | 0.47817  | 0.237154 |  |
| PNA     | 0              | 0        | 0        | 0        | 0        | 0        | 0        | 0        | 0        | 0        | 0        | 0        | 0        | 0        | 0              | 0      | 0        | 0        | 0        | 0        | 0        | 0.046512 | 0        | 0        |  |
| WFA     | 0.068053       | 0        | 0        | 0        | 0.276995 | 0.310345 | 0.191837 | 0        | 0        | 0.036873 | 0.443381 | 0.065421 | 0        | 0.139108 | 0.041467       | 0.1776 | 0.07598  | 0        | 0.09127  | 0.07438  | 0        | 0.417151 | 0.087318 | 0        |  |
| ACA     | 0.147448       | 0        | 0.220884 | 0.097328 | 0.230047 | 0.396552 | 0.297959 | 0.083019 | 0        | 0.057522 | 0.263158 | 0.174455 | 0.108108 | 0.188976 | 0.087719       | 0.0736 | 0.095588 | 0        | 0.162698 | 0.165289 | 0.074627 | 0.258721 | 0.340956 | 0.142292 |  |
| MPA     | 0              | 0        | 0.060241 | 0        | 0.090767 | 0.4      | 0.030612 | 0        | 0        | 0.030973 | 0.111643 | 0.140187 | 0.057915 | 0.089239 | 0.033493       | 0.0592 | 0.053922 | 0        | 0.051587 | 0.095041 | 0        | 0.357558 | 0.168399 | 0        |  |
| HPA     | 0.043478       | 0        | 0.200803 | 0        | 0.021909 | 0.075862 | 0        | 0        | 0.177632 | 0        | 0        | 0.099688 | 0        | 0        | 0.041467       | 0      | 0.063725 | 0        | 0.055556 | 0.123967 | 0        | 0.077035 | 0.045738 | 0        |  |
| VVA     | 0              | 0        | 0        | 0        | 0.039124 | 0.034483 | 0        | 0        | 0        | 0        | 0        | 0        | 0        | 0        | 0.028708       | 0      | 0        | 0        | 0        | 0        | 0        | 0.258721 | 0        | 0        |  |
| DBA     | 0              | 0        | 0.116466 | 0.024809 | 0        | 0        | 0        | 0        | 0        | 0        | 0.07496  | 0        | 0        | 0        | 0.108453       | 0      | 0        | 0        | 0        | 0.061983 | 0        | 0.109012 | 0        | 0        |  |
| SBA     | 0              | 0        | 0        | 0        | 0.090767 | 0.034483 | 0.030612 | 0        | 0        | 0        | 0.118022 | 0        | 0        | 0.036745 | 0.028708       | 0.0304 | 0        | 0        | 0        | 0        | 0        | 0.292151 | 0        | 0        |  |
| Calsepa | 0.196597       | 0.485714 | 0.389558 | 0.280534 | 0.27543  | 0.206897 | 0.283673 | 0.162264 | 0.098684 | 0.199115 | 0.175439 | 0.23676  | 0.301158 | 0.283465 | 0.362041       | 0.232  | 0.257353 | 0.430851 | 0.416667 | 0.303719 | 0.233831 | 0.226744 | 0.149688 | 0.320158 |  |
| PTL-I   | 0              | 0        | 0        | 0        | 0        | 0        | 0        | 0        | 0        | 0        | 0        | 0        | 0        | 0        | 0              | 0      | 0        | 0        | 0        | 0        | 0        | 0.055233 | 0        | 0        |  |
| MAH     | 0              | 0        | 0.092369 | 0.087786 | 0.068858 | 0.117241 | 0.026531 | 0        | 0        | 0.081121 | 0.221691 | 0.29595  | 0.088803 | 0.041995 | 0.14673        | 0.0944 | 0.058824 | 0.053191 | 0.162698 | 0.045455 | 0        | 0.094477 | 0.193347 | 0.059289 |  |
| WGA     | 0.206049       | 1.571429 | 0.538153 | 0.225191 | 0.358372 | 0.672414 | 0.293878 | 0.464151 | 0.407895 | 0.340708 | 0.429027 | 0.514019 | 0.397683 | 0.464567 | 0.290271       | 0.408  | 0.526961 | 0.37766  | 0.388889 | 0.448347 | 0.333333 | 0.303779 | 0.476091 | 0.252964 |  |
| GSL-IA4 | 0              | 0        | 0        | 0        | 0        | 0.07931  | 0        | 0        | 0        | 0        | 0        | 0        | 0        | 0        | 0              | 0      | 0        | 0        | 0        | 0        | 0        | 0.161337 | 0        | 0        |  |
| GSL-IB4 | 0              | 0        | 0        | 0        | 0        | 0        | 0        | 0        | 0        | 0        | 0        | 0        | 0        | 0        | 0              | 0      | 0        | 0        | 0        | 0        | 0        | 0.104651 | 0        | 0        |  |
