# Supplementary material for: Multilectin-assisted fractionation for improved single-dot tissue glycome profiling in clinical glycoproteomics
Source: Royal Society of Chemistry journal article supplement (doi:10.1039/c3mb70430k), 2013-11-12
Supplement: c3mb70430k_5.pdf [file c3mb70430k_5.pdf]

Table S5-1 Statistical analysis result of all of lectins between CRC patients with good and poor prognoses based on lectin microarray combined with AAL and ABA-assisted fractionation

|         | Input                 |                       |              | AAL(+)                |                       |              | AAL(-)                |                       |              | ABA(+)                |                       |              | ABA(-)                |                       |          |
|---------|-----------------------|-----------------------|--------------|-----------------------|-----------------------|--------------|-----------------------|-----------------------|--------------|-----------------------|-----------------------|--------------|-----------------------|-----------------------|----------|
|         | Good prognosis (n=11) | Poor prognosis (n=11) | <i>p</i>     | Good prognosis (n=11) | Poor prognosis (n=11) | <i>p</i>     | Good prognosis (n=11) | Poor prognosis (n=11) | <i>p</i>     | Good prognosis (n=11) | Poor prognosis (n=11) | <i>p</i>     | Good prognosis (n=11) | Poor prognosis (n=11) | <i>p</i> |
| LTL     | 0                     | 0                     | 0.315        | 0                     | 0                     | 0.209        | 0                     | 0                     | 0.948        | 0                     | 0                     | 0.277        | 0                     | 0                     | 0.948    |
| PSA     | 6800                  | 5900                  | 0.490        | 4900                  | 5900                  | 0.768        | 0                     | 0                     | 0.315        | 2700                  | 3600                  | 0.430        | 2800                  | 3300                  | 0.511    |
| LCA     | 6500                  | 6200                  | 0.793        | 6100                  | 6200                  | 0.669        | 0                     | 0                     | 0.451        | 2300                  | 4000                  | 0.393        | 3300                  | 3600                  | 0.718    |
| UEA-I   | 0                     | 1200                  | 0.092        | 0                     | 1200                  | 0.092        | 0                     | 0                     | 1.000        | 0                     | 1200                  | 0.092        | 0                     | 0                     | 0.317    |
| AOL     | 25700                 | 19600                 | 0.200        | 25700                 | 19600                 | 0.200        | 0                     | 0                     | 0.148        | 8700                  | 9900                  | 0.948        | 15400                 | 11100                 | 0.158    |
| AAL     | 23800                 | 18000                 | 0.279        | 23800                 | 18000                 | 0.279        | 0                     | 0                     | 1.000        | 9200                  | 9000                  | 0.974        | 14500                 | 9700                  | 0.123    |
| MAL     | 0                     | 2200                  | <b>0.035</b> | 0                     | 2200                  | <b>0.035</b> | 0                     | 0                     | 1.000        | 0                     | 2200                  | <b>0.035</b> | 0                     | 0                     | 0.148    |
| SNA     | 19000                 | 20200                 | 0.224        | 14800                 | 13400                 | 0.870        | 0                     | 8800                  | <b>0.037</b> | 4800                  | 8500                  | <b>0.049</b> | 12100                 | 11300                 | 0.818    |
| SSA     | 19400                 | 20500                 | 0.212        | 17000                 | 14800                 | 0.870        | 0                     | 8200                  | <b>0.038</b> | 5100                  | 8600                  | <b>0.025</b> | 13500                 | 12900                 | 0.793    |
| TJA-I   | 29200                 | 29600                 | 0.412        | 23500                 | 19300                 | 0.533        | 0                     | 15000                 | <b>0.038</b> | 6700                  | 10600                 | 0.082        | 18700                 | 21100                 | 0.450    |
| PHA-L   | 0                     | 1800                  | 0.058        | 0                     | 1800                  | 0.058        | 0                     | 0                     | 0.317        | 0                     | 1800                  | <b>0.025</b> | 0                     | 0                     | 0.545    |
| ECA     | 1000                  | 1900                  | 0.064        | 1000                  | 1900                  | 0.051        | 0                     | 0                     | 0.948        | 1000                  | 1900                  | <b>0.047</b> | 0                     | 0                     | 0.262    |
| RCA120  | 8100                  | 11600                 | 0.140        | 8100                  | 11600                 | 0.148        | 0                     | 0                     | 0.118        | 3600                  | 6400                  | 0.107        | 3300                  | 3900                  | 0.393    |
| PHA-E   | 7300                  | 9200                  | 0.131        | 7300                  | 9200                  | 0.131        | 0                     | 0                     | 1.000        | 4900                  | 6700                  | 0.178        | 1600                  | 2500                  | 0.353    |
| DSA     | 32500                 | 35500                 | 0.393        | 32500                 | 32900                 | 0.577        | 0                     | 5400                  | <b>0.018</b> | 12200                 | 13500                 | 0.224        | 20200                 | 22000                 | 0.412    |
| GSL-II  | 0                     | 0                     | 0.317        | 0                     | 0                     | 0.317        | 0                     | 0                     | 1.000        | 0                     | 0                     | 0.317        | 0                     | 0                     | 1.000    |
| NPA     | 2200                  | 3700                  | 0.178        | 1300                  | 2400                  | 0.341        | 0                     | 1500                  | <b>0.027</b> | 1300                  | 2700                  | 0.148        | 1400                  | 1700                  | 0.171    |
| ConA    | 11900                 | 13200                 | 0.224        | 10000                 | 6700                  | 0.533        | 0                     | 6100                  | 0.053        | 3700                  | 5400                  | 0.250        | 7200                  | 6900                  | 0.895    |
| GNA     | 2900                  | 3100                  | 0.199        | 1900                  | 2700                  | 0.138        | 0                     | 0                     | 0.948        | 1500                  | 2400                  | 0.113        | 0                     | 1100                  | 0.298    |
| HHL     | 2300                  | 2600                  | 0.409        | 2300                  | 2600                  | 0.409        | 0                     | 0                     | 0.317        | 2300                  | 2600                  | 0.644        | 0                     | 1000                  | 0.219    |
| ACG     | 5500                  | 6700                  | 0.293        | 5300                  | 4800                  | 0.743        | 0                     | 1300                  | <b>0.012</b> | 2600                  | 3000                  | 0.393        | 2400                  | 3500                  | 0.428    |
| TxLC-I  | 0                     | 1200                  | 0.162        | 0                     | 1200                  | 0.162        | 0                     | 0                     | 1.000        | 0                     | 1200                  | 0.162        | 0                     | 0                     | 1.000    |
| BPL     | 1900                  | 5000                  | 0.392        | 1900                  | 5000                  | 0.392        | 0                     | 0                     | 1.000        | 1500                  | 5000                  | 0.264        | 0                     | 0                     | 0.900    |
| TJA-II  | 3700                  | 7500                  | <b>0.035</b> | 3700                  | 7500                  | 0.052        | 0                     | 0                     | 0.147        | 3500                  | 7500                  | <b>0.035</b> | 0                     | 0                     | 0.341    |
| EEL     | 0                     | 0                     | 0.070        | 0                     | 0                     | 0.070        | 0                     | 0                     | 1.000        | 0                     | 0                     | 0.070        | 0                     | 0                     | 0.317    |
| ABA     | 6300                  | 9800                  | 0.071        | 6300                  | 7900                  | 0.491        | 0                     | 2500                  | <b>0.008</b> | 6300                  | 9800                  | 0.071        | 0                     | 0                     | 1.000    |
| LEL     | 34100                 | 36400                 | 0.491        | 31600                 | 26400                 | 0.870        | 0                     | 8000                  | 0.053        | 10000                 | 14100                 | 0.057        | 21200                 | 22200                 | 0.768    |
| STL     | 27900                 | 26000                 | 0.309        | 21300                 | 20400                 | 0.922        | 0                     | 4800                  | <b>0.031</b> | 9600                  | 10100                 | 0.533        | 14300                 | 15100                 | 0.718    |
| UDA     | 24200                 | 20700                 | 0.646        | 22100                 | 12800                 | 0.224        | 0                     | 7600                  | 0.053        | 8600                  | 6400                  | 0.532        | 15600                 | 14000                 | 0.511    |
| PWM     | 6200                  | 6400                  | 0.200        | 2000                  | 3200                  | 0.767        | 0                     | 2700                  | <b>0.038</b> | 1700                  | 3200                  | <b>0.041</b> | 3300                  | 3000                  | 0.263    |
| Jacalin | 5700                  | 8200                  | 0.189        | 5700                  | 5500                  | 0.622        | 0                     | 2800                  | <b>0.010</b> | 5700                  | 8200                  | 0.189        | 0                     | 0                     | 1.000    |
| PNA     | 0                     | 0                     | 0.317        | 0                     | 0                     | 0.317        | 0                     | 0                     | 1.000        | 0                     | 0                     | 0.317        | 0                     | 0                     | 1.000    |
| WFA     | 1400                  | 2400                  | 0.148        | 1400                  | 2400                  | 0.148        | 0                     | 0                     | 1.000        | 300                   | 2400                  | 0.114        | 0                     | 0                     | 0.475    |
| ACA     | 2000                  | 4000                  | 0.236        | 2000                  | 4000                  | 0.236        | 0                     | 0                     | 1.000        | 2000                  | 4000                  | 0.430        | 0                     | 0                     | 0.070    |
| MPA     | 0                     | 1700                  | 0.129        | 0                     | 1700                  | 0.129        | 0                     | 0                     | <b>0.317</b> | 0                     | 1700                  | 0.129        | 0                     | 0                     | 1.000    |
| HPA     | 0                     | 0                     | 0.070        | 0                     | 0                     | 0.070        | 0                     | 0                     | 0.317        | 0                     | 0                     | 0.070        | 0                     | 0                     | 1.000    |
| VVA     | 0                     | 0                     | 0.317        | 0                     | 0                     | 0.317        | 0                     | 0                     | 1.000        | 0                     | 0                     | 0.317        | 0                     | 0                     | 1.000    |
| DBA     | 0                     | 0                     | 0.070        | 0                     | 0                     | 0.070        | 0                     | 0                     | 1.000        | 0                     | 0                     | 0.070        | 0                     | 0                     | 1.000    |
| SBA     | 0                     | 0                     | 0.070        | 0                     | 0                     | 0.070        | 0                     | 0                     | 1.000        | 0                     | 0                     | 0.070        | 0                     | 0                     | 1.000    |
| Calsepa | 9300                  | 9500                  | 0.490        | 5900                  | 5900                  | 0.742        | 0                     | 2700                  | <b>0.045</b> | 2500                  | 4900                  | 0.199        | 6100                  | 5400                  | 0.895    |
| PTL-I   | 0                     | 0                     | 0.317        | 0                     | 0                     | 0.317        | 0                     | 0                     | 1.000        | 0                     | 0                     | 0.317        | 0                     | 0                     | 1.000    |
| MAH     | 1100                  | 1300                  | 0.243        | 1000                  | 1300                  | 0.317        | 0                     | 0                     | 0.306        | 1100                  | 1300                  | 0.243        | 0                     | 0                     | 1.000    |
| WGA     | 12000                 | 18100                 | 0.139        | 12000                 | 18100                 | 0.158        | 0                     | 0                     | <b>0.032</b> | 8900                  | 13800                 | 0.178        | 2700                  | 3900                  | 0.766    |
| GSL-IA4 | 0                     | 0                     | 0.317        | 0                     | 0                     | 0.317        | 0                     | 0                     | 1.000        | 0                     | 0                     | 0.317        | 0                     | 0                     | 1.000    |
| GSL-IB4 | 0                     | 0                     | 0.317        | 0                     | 0                     | 0.317        | 0                     | 0                     | 1.000        | 0                     | 0                     | 0.317        | 0                     | 0                     | 1.000    |

The values were presented as the median after gain-merging. *p*-values in bold indicate statistical significance by Mann-Whitney U test.

**Table S5-2 Statistical analysis result of all of lectins between CRC patients with good and poor prognoses based on lectin microarray combined with AAL and ABA-assisted fractionation**

|         | Input          |       |       |       |       |       |       |       |       |       |       |                |       |       |       |       |       |       |       |       |       |       |
|---------|----------------|-------|-------|-------|-------|-------|-------|-------|-------|-------|-------|----------------|-------|-------|-------|-------|-------|-------|-------|-------|-------|-------|
|         | Good prognosis |       |       |       |       |       |       |       |       |       |       | Poor prognosis |       |       |       |       |       |       |       |       |       |       |
|         | 1              | 2     | 3     | 4     | 5     | 6     | 7     | 8     | 9     | 10    | 11    | 1              | 2     | 3     | 4     | 5     | 6     | 7     | 8     | 9     | 10    | 11    |
| LTL     | 0              | 0     | 0     | 1000  | 0     | 0     | 0     | 0     | 5000  | 0     | 0     | 1400           | 7500  | 0     | 0     | 0     | 1300  | 0     | 0     | 3800  | 0     | 0     |
| PSA     | 7100           | 7900  | 6800  | 10500 | 3000  | 2000  | 4300  | 7100  | 7500  | 5700  | 4900  | 5900           | 24800 | 9200  | 5800  | 3300  | 8400  | 8100  | 3600  | 8300  | 3000  | 5700  |
| LCA     | 7200           | 7900  | 6500  | 10100 | 2500  | 2300  | 4500  | 7200  | 8100  | 6300  | 6100  | 6200           | 26100 | 8700  | 6100  | 3300  | 8200  | 7100  | 4300  | 9100  | 4900  | 5500  |
| UEA-I   | 0              | 0     | 2200  | 0     | 0     | 1500  | 0     | 2100  | 0     | 1100  | 0     | 3600           | 7000  | 1200  | 0     | 0     | 2600  | 3900  | 0     | 2800  | 1100  | 0     |
| AOL     | 29700          | 25700 | 28100 | 23500 | 13500 | 11000 | 20100 | 30500 | 30500 | 27400 | 23700 | 27800          | 54000 | 19600 | 15700 | 10500 | 22100 | 26600 | 13100 | 26600 | 14200 | 11500 |
| AAL     | 26000          | 23800 | 30700 | 22800 | 13700 | 11100 | 21700 | 29300 | 30200 | 24400 | 23400 | 25900          | 45800 | 18500 | 16400 | 9300  | 18000 | 25000 | 13400 | 27100 | 15100 | 14400 |
| MAL     | 1200           | 1700  | 1200  | 0     | 0     | 0     | 0     | 0     | 2000  | 1200  | 0     | 1000           | 6000  | 4400  | 2200  | 0     | 2900  | 2000  | 0     | 8500  | 3600  | 0     |
| SNA     | 19000          | 17900 | 23800 | 14800 | 9300  | 7700  | 11300 | 22200 | 21000 | 20500 | 19800 | 19200          | 36800 | 26900 | 20200 | 10900 | 21300 | 16400 | 13400 | 33400 | 25500 | 16900 |
| SSA     | 19200          | 19400 | 26000 | 17000 | 10900 | 10100 | 10900 | 22800 | 25200 | 22700 | 21600 | 20500          | 44500 | 31700 | 22700 | 13200 | 19500 | 19500 | 12900 | 33700 | 26900 | 18600 |
| TJA-I   | 29200          | 28400 | 34600 | 23500 | 18300 | 15200 | 19600 | 32300 | 35800 | 33000 | 31800 | 29600          | 67600 | 46900 | 31700 | 21200 | 28100 | 26000 | 19300 | 47000 | 39300 | 28100 |
| PHA-L   | 0              | 0     | 1800  | 0     | 0     | 0     | 0     | 0     | 2800  | 2900  | 0     | 1900           | 5900  | 4100  | 1400  | 0     | 1500  | 2400  | 0     | 10100 | 1800  | 0     |
| ECA     | 1700           | 1200  | 1200  | 1600  | 0     | 0     | 0     | 0     | 3700  | 0     | 1000  | 2300           | 13000 | 4600  | 1500  | 0     | 2500  | 1900  | 0     | 15000 | 1700  | 0     |
| RCA120  | 12400          | 9800  | 12100 | 5700  | 5400  | 4300  | 4500  | 14600 | 7900  | 8100  | 9600  | 16400          | 17500 | 26600 | 11600 | 4700  | 7100  | 10300 | 5300  | 32600 | 15600 | 6500  |
| PHA-E   | 7300           | 8700  | 11300 | 5200  | 2200  | 2300  | 3500  | 8000  | 7900  | 9600  | 7200  | 9700           | 14900 | 18600 | 8700  | 2400  | 6000  | 9200  | 3900  | 36500 | 17600 | 4100  |
| DSA     | 32500          | 35900 | 32400 | 28600 | 19800 | 14400 | 27200 | 37300 | 43100 | 39800 | 39200 | 35500          | 57800 | 59100 | 35500 | 21500 | 25200 | 37300 | 21800 | 77400 | 48800 | 30600 |
| GSL-II  | 0              | 0     | 0     | 0     | 0     | 0     | 0     | 0     | 0     | 0     | 0     | 0              | 0     | 0     | 0     | 0     | 0     | 0     | 0     | 3900  | 0     | 0     |
| NPA     | 4600           | 4700  | 4900  | 6800  | 0     | 1300  | 0     | 2800  | 2200  | 2200  | 1000  | 10600          | 10800 | 8000  | 3700  | 1700  | 7200  | 4300  | 1900  | 3300  | 2100  | 2100  |
| ConA    | 12500          | 11900 | 11200 | 14700 | 6200  | 5000  | 8400  | 12400 | 20300 | 13100 | 10000 | 14300          | 35100 | 13200 | 12200 | 8600  | 14900 | 12200 | 6700  | 18400 | 10200 | 14400 |
| GNA     | 2900           | 3800  | 3000  | 3200  | 0     | 0     | 0     | 1600  | 3400  | 2900  | 1900  | 9300           | 7500  | 9700  | 2200  | 1300  | 3200  | 2400  | 0     | 9800  | 2700  | 3100  |
| HHL     | 6800           | 5200  | 5400  | 8900  | 1300  | 0     | 1700  | 2700  | 0     | 2300  | 0     | 10400          | 8500  | 10200 | 2600  | 0     | 1600  | 5500  | 1900  | 5600  | 0     | 2100  |
| ACG     | 7500           | 5500  | 4600  | 2900  | 0     | 1000  | 1800  | 5500  | 6700  | 8900  | 8400  | 6700           | 7000  | 11300 | 7600  | 1600  | 4800  | 4400  | 4300  | 16900 | 11900 | 3200  |
| TxLC-I  | 1400           | 1100  | 2200  | 0     | 0     | 0     | 0     | 1200  | 0     | 0     | 0     | 3900           | 3900  | 4000  | 1200  | 0     | 0     | 0     | 0     | 7600  | 1700  | 0     |
| BPL     | 8600           | 6300  | 2900  | 4700  | 1200  | 0     | 1500  | 5400  | 1900  | 1300  | 1400  | 13100          | 7400  | 7400  | 1600  | 0     | 5000  | 2000  | 1300  | 28700 | 5900  | 0     |
| TJA-II  | 5700           | 4100  | 5600  | 2000  | 0     | 1400  | 0     | 6900  | 3200  | 6400  | 3700  | 8100           | 11400 | 15800 | 6800  | 2000  | 6600  | 7500  | 0     | 23600 | 11300 | 1300  |
| EEL     | 0              | 0     | 0     | 0     | 0     | 0     | 0     | 0     | 0     | 0     | 0     | 0              | 0     | 0     | 1000  | 0     | 1700  | 0     | 0     | 19000 | 0     | 0     |
| ABA     | 9100           | 6300  | 8700  | 7200  | 1700  | 3800  | 4400  | 12400 | 4400  | 5900  | 7100  | 9800           | 17500 | 14400 | 7400  | 2400  | 7300  | 12100 | 3500  | 26200 | 14100 | 6700  |
| LEL     | 48800          | 39800 | 26600 | 31600 | 21500 | 17900 | 22600 | 34100 | 64400 | 40000 | 37000 | 49600          | 55900 | 61600 | 33100 | 20600 | 24800 | 29100 | 21700 | 51100 | 60600 | 36400 |
| STL     | 28100          | 33400 | 17600 | 20700 | 14400 | 9900  | 18600 | 28500 | 33500 | 27900 | 27900 | 39500          | 38500 | 35500 | 25200 | 12400 | 18900 | 20900 | 10600 | 37900 | 39400 | 26000 |
| UDA     | 28300          | 28700 | 24200 | 26600 | 12900 | 8700  | 22100 | 26100 | 24500 | 18900 | 14000 | 28400          | 45000 | 28700 | 21000 | 10600 | 22600 | 20400 | 12800 | 20700 | 13800 | 12400 |
| PWM     | 7500           | 6900  | 7300  | 6800  | 2000  | 2800  | 1700  | 1900  | 6200  | 6300  | 1600  | 12300          | 12600 | 7200  | 6400  | 4400  | 14800 | 5500  | 3200  | 21800 | 4700  | 1200  |
| Jacalin | 10000          | 9100  | 8100  | 8100  | 1500  | 4000  | 3900  | 12900 | 4200  | 4700  | 5700  | 10100          | 12900 | 13600 | 7200  | 3000  | 7600  | 8200  | 3300  | 28700 | 22500 | 5000  |
| PNA     | 0              | 0     | 0     | 0     | 0     | 0     | 0     | 0     | 0     | 0     | 0     | 0              | 0     | 0     | 0     | 0     | 0     | 0     | 0     | 1700  | 0     | 0     |
| WFA     | 2300           | 1800  | 1500  | 0     | 0     | 0     | 0     | 2500  | 1400  | 0     | 1500  | 6200           | 2800  | 13400 | 2400  | 0     | 1200  | 2500  | 0     | 35400 | 1100  | 0     |
| ACA     | 6000           | 1900  | 4200  | 2500  | 1500  | 0     | 1700  | 9800  | 1700  | 2000  | 2000  | 7200           | 5500  | 3500  | 1900  | 0     | 4000  | 4500  | 0     | 19200 | 13800 | 2100  |
| MPA     | 1800           | 0     | 1400  | 1100  | 0     | 0     | 0     | 3700  | 0     | 0     | 1100  | 3700           | 1700  | 2900  | 0     | 0     | 1500  | 3500  | 0     | 23200 | 9200  | 0     |
| HPA     | 0              | 0     | 0     | 0     | 0     | 0     | 0     | 0     | 0     | 0     | 0     | 0              | 2300  | 0     | 0     | 0     | 0     | 5900  | 0     | 5500  | 0     | 0     |
| VVA     | 0              | 0     | 0     | 0     | 0     | 0     | 0     | 0     | 0     | 0     | 0     | 0              | 0     | 0     | 0     | 0     | 0     | 0     | 0     | 16000 | 0     | 0     |
| DBA     | 0              | 0     | 0     | 0     | 0     | 0     | 0     | 0     | 0     | 0     | 0     | 0              | 5400  | 0     | 0     | 0     | 0     | 3200  | 0     | 5500  | 0     | 0     |
| SBA     | 0              | 0     | 0     | 0     | 0     | 0     | 0     | 0     | 0     | 0     | 0     | 1300           | 0     | 2700  | 0     | 0     | 0     | 0     | 0     | 20000 | 0     | 0     |
| Calsepa | 10200          | 12200 | 9300  | 12400 | 4200  | 3100  | 5900  | 10200 | 11700 | 8800  | 4700  | 12300          | 26800 | 17500 | 8300  | 5200  | 9500  | 13700 | 5800  | 10500 | 2200  | 8600  |
| PTL-I   | 0              | 0     | 0     | 0     | 0     | 0     | 0     | 0     | 0     | 0     | 0     | 0              | 0     | 0     | 0     | 0     | 0     | 0     | 0     | 1100  | 0     | 0     |
| MAH     | 1200           | 1700  | 1100  | 1000  | 0     | 0     | 0     | 3600  | 1900  | 2400  | 0     | 0              | 9200  | 3800  | 1300  | 0     | 2800  | 1000  | 0     | 4900  | 6600  | 1200  |
| WGA     | 17600          | 12000 | 15400 | 10100 | 5900  | 2900  | 9000  | 18100 | 16900 | 12600 | 11900 | 18800          | 20500 | 26700 | 17600 | 6000  | 9100  | 18100 | 6700  | 20400 | 21100 | 5200  |
| GSL-IA4 | 0              | 0     | 0     | 0     | 0     | 0     | 0     | 0     | 0     | 0     | 0     | 0              | 0     | 0     | 0     | 0     | 0     | 0     | 0     | 9900  | 0     | 0     |
| GSL-IB4 | 0              | 0     | 0     | 0     | 0     | 0     | 0     | 0     | 0     | 0     | 0     | 0              | 0     | 0     | 0     | 0     | 0     | 0     | 0     | 4600  | 0     | 0     |

**Table S5-3 Statistical analysis result of all of lectins between CRC patients with good and poor prognoses based on lectin microarray combined with AAL and ABA-assisted fractionation**

|         | AAL elution fraction (AAL(+)) |       |       |       |       |       |       |       |       |       |       |                |       |       |       |       |       |       |       |       |       |       |
|---------|-------------------------------|-------|-------|-------|-------|-------|-------|-------|-------|-------|-------|----------------|-------|-------|-------|-------|-------|-------|-------|-------|-------|-------|
|         | Good prognosis                |       |       |       |       |       |       |       |       |       |       | Poor prognosis |       |       |       |       |       |       |       |       |       |       |
|         | 1                             | 2     | 3     | 4     | 5     | 6     | 7     | 8     | 9     | 10    | 11    | 1              | 2     | 3     | 4     | 5     | 6     | 7     | 8     | 9     | 10    | 11    |
| LTL     | 0                             | 0     | 0     | 1000  | 0     | 0     | 0     | 0     | 1000  | 0     | 0     | 1400           | 4500  | 0     | 0     | 0     | 1300  | 0     | 0     | 3800  | 0     | 0     |
| PSA     | 7100                          | 7900  | 6800  | 10500 | 3000  | 2000  | 4300  | 7100  | 4500  | 4700  | 4900  | 5900           | 18500 | 9200  | 5800  | 3300  | 6300  | 8100  | 3600  | 8300  | 1800  | 4100  |
| LCA     | 7200                          | 7900  | 6500  | 10100 | 2500  | 2300  | 4500  | 7200  | 5100  | 3900  | 6100  | 6200           | 18900 | 8700  | 6100  | 3300  | 6700  | 7100  | 4300  | 9100  | 3400  | 4500  |
| UEA-I   | 0                             | 0     | 2200  | 0     | 0     | 1500  | 0     | 2100  | 0     | 1100  | 0     | 3600           | 7000  | 1200  | 0     | 0     | 2600  | 3900  | 0     | 2800  | 1100  | 0     |
| AOL     | 29700                         | 25700 | 28100 | 23500 | 13500 | 11000 | 20100 | 30500 | 30500 | 27400 | 23700 | 27800          | 52600 | 19600 | 15700 | 10500 | 21000 | 26600 | 13100 | 26600 | 14200 | 11500 |
| AAL     | 26000                         | 23800 | 30700 | 22800 | 13700 | 11100 | 21700 | 29300 | 30200 | 24400 | 23400 | 25900          | 45800 | 18500 | 16400 | 9300  | 18000 | 25000 | 13400 | 27100 | 15100 | 14400 |
| MAL     | 1200                          | 1700  | 1200  | 0     | 0     | 0     | 0     | 0     | 2000  | 1200  | 0     | 1000           | 6000  | 4400  | 2200  | 0     | 2900  | 2000  | 0     | 8500  | 3600  | 0     |
| SNA     | 19000                         | 17900 | 23800 | 14800 | 9300  | 7700  | 11300 | 22200 | 4400  | 9800  | 19800 | 16100          | 13600 | 16400 | 11400 | 10900 | 12500 | 11600 | 13400 | 33400 | 13400 | 5500  |
| SSA     | 19200                         | 19400 | 26000 | 17000 | 10900 | 10100 | 10900 | 22800 | 6700  | 12800 | 21600 | 17400          | 21900 | 22100 | 14500 | 13200 | 10800 | 15800 | 12900 | 33700 | 14800 | 8300  |
| TJA-I   | 29200                         | 28400 | 34600 | 23500 | 18300 | 15200 | 19600 | 32300 | 7800  | 15000 | 31800 | 22900          | 31200 | 28800 | 16700 | 21200 | 11700 | 18200 | 19300 | 47000 | 18200 | 11200 |
| PHA-L   | 0                             | 0     | 1800  | 0     | 0     | 0     | 0     | 0     | 2800  | 2900  | 0     | 1900           | 5900  | 4100  | 1400  | 0     | 500   | 2400  | 0     | 10100 | 1800  | 0     |
| ECA     | 1700                          | 1200  | 1200  | 1600  | 0     | 0     | 0     | 0     | 2300  | 0     | 1000  | 2300           | 8800  | 4600  | 1500  | 0     | 2500  | 1900  | 0     | 15000 | 1700  | 0     |
| RCA120  | 12400                         | 9800  | 12100 | 5700  | 5400  | 4300  | 4500  | 14600 | 6700  | 8100  | 9600  | 15000          | 15000 | 21300 | 11600 | 4700  | 7100  | 10300 | 5300  | 32600 | 15600 | 5400  |
| PHA-E   | 7300                          | 8700  | 11300 | 5200  | 2200  | 2300  | 3500  | 8000  | 7900  | 9600  | 7200  | 9700           | 14900 | 18600 | 8700  | 2400  | 6000  | 9200  | 3900  | 36500 | 17600 | 4100  |
| DSA     | 32500                         | 35900 | 32400 | 28600 | 19800 | 14400 | 27200 | 37300 | 37000 | 32500 | 39200 | 33700          | 45600 | 46700 | 28900 | 21500 | 18700 | 32900 | 21800 | 77400 | 43400 | 20000 |
| GSL-II  | 0                             | 0     | 0     | 0     | 0     | 0     | 0     | 0     | 0     | 0     | 0     | 0              | 0     | 0     | 0     | 0     | 0     | 0     | 0     | 3900  | 0     | 0     |
| NPA     | 4600                          | 4700  | 4900  | 6800  | 0     | 1300  | 0     | 2800  | 500   | 700   | 1000  | 8800           | 7500  | 6400  | 2400  | 1700  | 2400  | 4300  | 1900  | 3300  | 600   | 100   |
| ConA    | 12500                         | 11900 | 11200 | 14700 | 6200  | 5000  | 8400  | 12400 | 5800  | 2700  | 10000 | 10200          | 17500 | 7700  | 6100  | 8600  | 5900  | 5100  | 6700  | 18400 | 1400  | 5400  |
| GNA     | 2900                          | 3800  | 3000  | 3200  | 0     | 0     | 0     | 1600  | 1000  | 2900  | 1900  | 9300           | 7500  | 9700  | 2200  | 1300  | 3200  | 2400  | 0     | 9800  | 2700  | 2100  |
| HHL     | 6800                          | 5200  | 5400  | 8900  | 1300  | 0     | 1700  | 2700  | 0     | 2300  | 0     | 10400          | 8500  | 9100  | 2600  | 0     | 1600  | 5500  | 1900  | 5600  | 0     | 2100  |
| ACG     | 7500                          | 5500  | 4600  | 2900  | 0     | 1000  | 1800  | 5500  | 5300  | 8900  | 8400  | 6700           | 4900  | 10000 | 4800  | 1600  | 1000  | 3000  | 4300  | 16900 | 10600 | 2000  |
| TxLC-I  | 1400                          | 1100  | 2200  | 0     | 0     | 0     | 0     | 1200  | 0     | 0     | 0     | 3900           | 3900  | 4000  | 1200  | 0     | 0     | 0     | 0     | 7600  | 1700  | 0     |
| BPL     | 8600                          | 6300  | 2900  | 4700  | 1200  | 0     | 1500  | 5400  | 1900  | 1300  | 1400  | 13100          | 7400  | 7400  | 1600  | 0     | 5000  | 2000  | 1300  | 28700 | 5900  | 0     |
| TJA-II  | 5700                          | 4100  | 5600  | 2000  | 0     | 1400  | 0     | 6900  | 3200  | 6400  | 3700  | 8100           | 10400 | 15800 | 6800  | 2000  | 5600  | 7500  | 0     | 23600 | 11300 | 1300  |
| EEL     | 0                             | 0     | 0     | 0     | 0     | 0     | 0     | 0     | 0     | 0     | 0     | 0              | 0     | 0     | 1000  | 0     | 1700  | 0     | 0     | 19000 | 0     | 0     |
| ABA     | 9100                          | 6300  | 8700  | 7200  | 1700  | 3800  | 4400  | 12400 | 2300  | 3000  | 7100  | 7900           | 12200 | 8800  | 5100  | 2400  | 4800  | 8600  | 3500  | 26200 | 10900 | 1000  |
| LEL     | 48800                         | 39800 | 26600 | 31600 | 21500 | 17900 | 22600 | 34100 | 51200 | 27500 | 37000 | 44700          | 43700 | 46500 | 24600 | 20600 | 17400 | 21100 | 21700 | 51100 | 51300 | 26400 |
| STL     | 28100                         | 33400 | 17600 | 20700 | 14400 | 9900  | 18600 | 28500 | 25300 | 21300 | 27900 | 31900          | 29600 | 26600 | 20400 | 12400 | 12900 | 17000 | 10600 | 37900 | 35200 | 20100 |
| UDA     | 28300                         | 28700 | 24200 | 26600 | 12900 | 8700  | 22100 | 26100 | 9900  | 5800  | 14000 | 20800          | 27800 | 18100 | 14800 | 10600 | 11500 | 11900 | 12800 | 20700 | 6500  | 2000  |
| PWM     | 7500                          | 6900  | 7300  | 6800  | 2000  | 2800  | 1700  | 1900  | 1200  | -1000 | 1600  | 5500           | 7300  | 6000  | 2500  | 4400  | 1500  | 2800  | 3200  | 21800 | 400   | 200   |
| Jacalin | 10000                         | 9100  | 8100  | 8100  | 1500  | 4000  | 3900  | 12900 | 1500  | 1300  | 5700  | 8500           | 8900  | 8900  | 5500  | 3000  | 3600  | 4600  | 3300  | 28700 | 18800 | 2200  |
| PNA     | 0                             | 0     | 0     | 0     | 0     | 0     | 0     | 0     | 0     | 0     | 0     | 0              | 0     | 0     | 0     | 0     | 0     | 0     | 0     | 1700  | 0     | 0     |
| WFA     | 2300                          | 1800  | 1500  | 0     | 0     | 0     | 0     | 2500  | 1400  | 0     | 1500  | 6200           | 2800  | 13400 | 2400  | 0     | 1200  | 2500  | 0     | 35400 | 1100  | 0     |
| ACA     | 6000                          | 1900  | 4200  | 2500  | 1500  | 0     | 1700  | 9800  | 1700  | 2000  | 2000  | 7200           | 5500  | 3500  | 1900  | 0     | 4000  | 4500  | 0     | 19200 | 13800 | 2100  |
| MPA     | 1800                          | 0     | 1400  | 1100  | 0     | 0     | 0     | 3700  | 0     | 0     | 1100  | 3700           | 1700  | 2900  | 0     | 0     | 1500  | 2400  | 0     | 23200 | 9200  | 0     |
| HPA     | 0                             | 0     | 0     | 0     | 0     | 0     | 0     | 0     | 0     | 0     | 0     | 0              | 2300  | 0     | 0     | 0     | -1000 | 5900  | 0     | 5500  | 0     | 0     |
| VVA     | 0                             | 0     | 0     | 0     | 0     | 0     | 0     | 0     | 0     | 0     | 0     | 0              | 0     | 0     | 0     | 0     | 0     | 0     | 0     | 16000 | 0     | 0     |
| DBA     | 0                             | 0     | 0     | 0     | 0     | 0     | 0     | 0     | 0     | 0     | 0     | 0              | 5400  | 0     | 0     | 0     | 0     | 3200  | 0     | 5500  | 0     | 0     |
| SBA     | 0                             | 0     | 0     | 0     | 0     | 0     | 0     | 0     | 0     | 0     | 0     | 1300           | 0     | 2700  | 0     | 0     | 0     | 0     | 0     | 20000 | 0     | 0     |
| Calsepa | 10200                         | 12200 | 9300  | 12400 | 4200  | 3100  | 5900  | 10200 | 2400  | 3000  | 4700  | 9700           | 15700 | 11900 | 5900  | 5200  | 5800  | 11000 | 5800  | 10500 | -1900 | 1900  |
| PTL-I   | 0                             | 0     | 0     | 0     | 0     | 0     | 0     | 0     | 0     | 0     | 0     | 0              | 0     | 0     | 0     | 0     | 0     | 0     | 0     | 1100  | 0     | 0     |
| MAH     | 1200                          | 1700  | 1100  | 1000  | 0     | 0     | 0     | 3600  | 200   | 2400  | 0     | 0              | 6100  | 3800  | 1300  | 0     | 1300  | 1000  | 0     | 4900  | 6600  | 100   |
| WGA     | 17600                         | 12000 | 15400 | 10100 | 5900  | 2900  | 9000  | 18100 | 16900 | 12600 | 11900 | 18800          | 20500 | 24500 | 17600 | 6000  | 7500  | 18100 | 6700  | 20400 | 19900 | 4200  |
| GSL-IA4 | 0                             | 0     | 0     | 0     | 0     | 0     | 0     | 0     | 0     | 0     | 0     | 0              | 0     | 0     | 0     | 0     | 0     | 0     | 0     | 9900  | 0     | 0     |
| GSL-IB4 | 0                             | 0     | 0     | 0     | 0     | 0     | 0     | 0     | 0     | 0     | 0     | 0              | 0     | 0     | 0     | 0     | 0     | 0     | 0     | 4600  | 0     | 0     |



**Table S5-5 Statistical analysis result of all of lectins between CRC patients with good and poor prognoses based on lectin microarray combined with AAL and ABA-assisted fractionation**

|         | ABA elution fraction (ABA(+)) |       |       |       |      |      |      |       |       |       |       |                |       |       |       |       |       |       |       |       |       |       |
|---------|-------------------------------|-------|-------|-------|------|------|------|-------|-------|-------|-------|----------------|-------|-------|-------|-------|-------|-------|-------|-------|-------|-------|
|         | Good prognosis                |       |       |       |      |      |      |       |       |       |       | Poor prognosis |       |       |       |       |       |       |       |       |       |       |
|         | 1                             | 2     | 3     | 4     | 5    | 6    | 7    | 8     | 9     | 10    | 11    | 1              | 2     | 3     | 4     | 5     | 6     | 7     | 8     | 9     | 10    | 11    |
| LTL     | 0                             | 0     | 0     | 1000  | 0    | 0    | 0    | 0     | 2900  | 0     | 0     | 1400           | 5900  | 0     | 0     | 0     | 1300  | 0     | 0     | 3800  | 0     | 0     |
| PSA     | 4300                          | 3800  | 4300  | 5400  | 1900 | 700  | 2700 | 4600  | 1400  | 1400  | 400   | 4500           | 14300 | 4900  | 3200  | 1900  | 5100  | 5500  | 2200  | 3600  | -2700 | -1600 |
| LCA     | 4400                          | 4100  | 3800  | 5400  | 1200 | 2300 | 1700 | 3900  | 2000  | 900   | 1800  | 4900           | 14100 | 4500  | 2900  | 1700  | 4600  | 4500  | 2800  | 4000  | -500  | -1900 |
| UEA-I   | 0                             | 0     | 2200  | 0     | 0    | 1500 | 0    | 2100  | 0     | 1100  | 0     | 3600           | 5800  | 1200  | 0     | 0     | 2600  | 3900  | 0     | 2800  | 1100  | 0     |
| AOL     | 13100                         | 8700  | 12700 | 11400 | 4600 | 5200 | 8100 | 14300 | 7300  | 12200 | 7200  | 15400          | 24900 | 10100 | 8800  | 5200  | 11000 | 13500 | 7500  | 9900  | 3400  | -1700 |
| AAL     | 11500                         | 9200  | 13200 | 11800 | 4300 | 5900 | 9300 | 16200 | 7500  | 8100  | 6600  | 14600          | 20500 | 9700  | 9400  | 5300  | 9000  | 12200 | 8300  | 8800  | 5400  | 1900  |
| MAL     | 1200                          | 1700  | 1200  | 0     | 0    | 0    | 0    | 0     | 2000  | 1200  | 0     | 1000           | 4500  | 3400  | 2200  | 0     | 2900  | 2000  | 0     | 8500  | 3600  | 0     |
| SNA     | 7500                          | 5200  | 6000  | 7600  | 1700 | 1400 | 2800 | 10100 | 4100  | 4800  | 4100  | 10500          | 8500  | 9700  | 7600  | 3900  | 10000 | 6600  | 7400  | 23700 | 9300  | -2100 |
| SSA     | 5900                          | 4800  | 6500  | 8600  | 2400 | 2300 | 2300 | 9300  | 4000  | 5100  | 5400  | 11300          | 14400 | 11400 | 8500  | 4700  | 6600  | 8600  | 6600  | 22200 | 9100  | -1000 |
| TJA-I   | 11900                         | 9700  | 8600  | 10500 | 5700 | 4000 | 6700 | 12400 | 6300  | 4800  | 5600  | 14500          | 19000 | 18800 | 10600 | 7100  | 8500  | 10200 | 6600  | 23800 | 11200 | 300   |
| PHA-L   | 0                             | 0     | 1800  | 0     | 0    | 0    | 0    | 0     | 1300  | 2900  | 0     | 1900           | 4800  | 4100  | 1400  | 0     | 1500  | 2400  | 0     | 7600  | 1800  | 0     |
| ECA     | 1700                          | 1200  | 1200  | 1600  | 0    | 0    | 0    | 0     | 2200  | 0     | 1000  | 2300           | 9400  | 3300  | 1500  | 0     | 2500  | 1900  | 0     | 12000 | 1700  | 0     |
| RCA120  | 8600                          | 9800  | 4600  | 3600  | 3200 | 2800 | 1500 | 11300 | 2500  | 3500  | 3800  | 13200          | 3700  | 16200 | 6900  | 3500  | 4800  | 6400  | 3800  | 19500 | 12000 | 1200  |
| PHA-E   | 5700                          | 7100  | 7700  | 5200  | 2200 | 2300 | 2500 | 6800  | 2600  | 4900  | 4900  | 9700           | 10500 | 12000 | 6200  | 2400  | 4300  | 6700  | 3900  | 25700 | 14400 | 600   |
| DSA     | 10600                         | 12500 | 12200 | 12100 | 7700 | 6300 | 9300 | 19100 | 15000 | 12600 | 14500 | 17200          | 21200 | 22100 | 13500 | 11900 | 10800 | 12900 | 7600  | 46300 | 28200 | 5200  |
| GSL-II  | 0                             | 0     | 0     | 0     | 0    | 0    | 0    | 0     | 0     | 0     | 0     | 0              | 0     | 0     | 0     | 0     | 0     | 0     | 0     | 3900  | 0     | 0     |
| NPA     | 3200                          | 3000  | 3100  | 4900  | 0    | 1300 | 0    | 2800  | 800   | 200   | 1000  | 8700           | 7200  | 5500  | 2700  | 1700  | 4600  | 3200  | 1900  | 1600  | 1100  | -900  |
| ConA    | 7200                          | 2800  | 3800  | 6500  | 2700 | 3100 | 2700 | 5200  | 7900  | 3700  | 2800  | 9000           | 17800 | 6300  | 5400  | 3500  | 7000  | 5300  | 4200  | 11700 | 1400  | 1500  |
| GNA     | 2900                          | 2800  | 1500  | 3200  | 0    | 0    | 0    | 1600  | 1200  | 1300  | 1900  | 7700           | 5600  | 8300  | 2200  | 1300  | 3200  | 2400  | 0     | 6700  | 1600  | -300  |
| HHL     | 4600                          | 3500  | 4100  | 6800  | 1300 | 0    | 1700 | 2700  | 0     | 2300  | 0     | 7300           | 6400  | 6600  | 2600  | 0     | 600   | 4500  | 1900  | 3500  | 0     | 100   |
| ACG     | 5000                          | 3100  | 700   | 1800  | 0    | 1000 | 200  | 5500  | 2600  | 4500  | 3200  | 6700           | 2900  | 5500  | 2300  | -200  | 1300  | 3000  | 4300  | 13300 | 8400  | -1100 |
| TxLC-I  | 1400                          | 1100  | 2200  | 0     | 0    | 0    | 0    | 1200  | 0     | 0     | 0     | 3900           | 3900  | 4000  | 1200  | 0     | 0     | 0     | 0     | 7600  | 1700  | 0     |
| BPL     | 6400                          | 4400  | 2900  | 4700  | 1200 | 0    | 1500 | 5400  | 800   | 1300  | 1400  | 11300          | 5300  | 7400  | 1600  | 0     | 5000  | 2000  | 1300  | 20700 | 5900  | 0     |
| TJA-II  | 5700                          | 4100  | 4400  | 2000  | 0    | 1400 | 0    | 6900  | 1400  | 3500  | 3700  | 8100           | 9500  | 12200 | 5200  | 2000  | 6600  | 7500  | 0     | 19300 | 11300 | 200   |
| EEL     | 0                             | 0     | 0     | 0     | 0    | 0    | 0    | 0     | 0     | 0     | 0     | 0              | 0     | 0     | 1000  | 0     | 1700  | 0     | 0     | 17000 | 0     | 0     |
| ABA     | 9100                          | 6300  | 8700  | 7200  | 1700 | 3800 | 4400 | 12400 | 4400  | 5900  | 7100  | 9800           | 17500 | 14400 | 7400  | 2400  | 7300  | 12100 | 3500  | 26200 | 14100 | 6700  |
| LEL     | 19900                         | 10800 | 5700  | 10400 | 6400 | 7700 | 7400 | 17500 | 24400 | 9500  | 10000 | 28900          | 20400 | 26900 | 10700 | 9900  | 11000 | 14100 | 10800 | 28900 | 35100 | 3300  |
| STL     | 11500                         | 10900 | 6300  | 10200 | 6400 | 5500 | 6800 | 14200 | 7300  | 9700  | 9600  | 19100          | 11200 | 16600 | 10100 | 5400  | 7700  | 9000  | 4900  | 20500 | 26900 | 4400  |
| UDA     | 10200                         | 8600  | 9000  | 13000 | 4500 | 2200 | 9100 | 10200 | 600   | -1800 | -1600 | 12000          | 15500 | 11400 | 8000  | 3000  | 10400 | 6400  | 5700  | 5200  | 3000  | -6500 |
| PWM     | 4200                          | 3600  | 2400  | 2600  | 500  | 800  | 1700 | 800   | 1800  | 400   | 0     | 6400           | 6700  | 4700  | 1900  | 1700  | 4500  | 3000  | 3200  | 15200 | 1700  | -1000 |
| Jacalin | 10000                         | 9100  | 8100  | 8100  | 1500 | 4000 | 3900 | 12900 | 4200  | 4700  | 5700  | 10100          | 12900 | 13600 | 7200  | 3000  | 7600  | 8200  | 3300  | 28700 | 22500 | 5000  |
| PNA     | 0                             | 0     | 0     | 0     | 0    | 0    | 0    | 0     | 0     | 0     | 0     | 0              | 0     | 0     | 0     | 0     | 0     | 0     | 0     | 1700  | 0     | 0     |
| WFA     | 2300                          | 1800  | 1500  | 0     | 0    | 0    | 0    | 2500  | 300   | 0     | 1500  | 6200           | 2800  | 10700 | 2400  | 0     | 1200  | 2500  | 0     | 29000 | 1100  | 0     |
| ACA     | 6000                          | 1900  | 4200  | 2500  | 1500 | 0    | 1700 | 9800  | 1700  | 2000  | 2000  | 7200           | 5500  | 3500  | 1900  | 0     | 4000  | 4500  | 0     | 16400 | 12600 | 800   |
| MPA     | 1800                          | 0     | 1400  | 1100  | 0    | 0    | 0    | 3700  | 0     | 0     | 1100  | 3700           | 1700  | 2900  | 0     | 0     | 1500  | 3500  | 0     | 23200 | 9200  | 0     |
| HPA     | 0                             | 0     | 0     | 0     | 0    | 0    | 0    | 0     | 0     | 0     | 0     | 0              | 2300  | 0     | 0     | 0     | 0     | 5900  | 0     | 5500  | 0     | 0     |
| VVA     | 0                             | 0     | 0     | 0     | 0    | 0    | 0    | 0     | 0     | 0     | 0     | 0              | 0     | 0     | 0     | 0     | 0     | 0     | 0     | 16000 | 0     | 0     |
| DBA     | 0                             | 0     | 0     | 0     | 0    | 0    | 0    | 0     | 0     | 0     | 0     | 0              | 5400  | 0     | 0     | 0     | 0     | 3200  | 0     | 5500  | 0     | 0     |
| SBA     | 0                             | 0     | 0     | 0     | 0    | 0    | 0    | 0     | 0     | 0     | 0     | 1300           | 0     | 2700  | 0     | 0     | 0     | 0     | 0     | 20000 | 0     | 0     |
| Calsepa | 4100                          | 5700  | 3600  | 6100  | 1800 | 1800 | 2500 | 5100  | 700   | 500   | -1600 | 7200           | 10900 | 7000  | 3600  | 2200  | 4900  | 7900  | 3900  | 5100  | -3700 | -5600 |
| PTL-I   | 0                             | 0     | 0     | 0     | 0    | 0    | 0    | 0     | 0     | 0     | 0     | 0              | 0     | 0     | 0     | 0     | 0     | 0     | 0     | 1100  | 0     | 0     |
| MAH     | 1200                          | 1700  | 1100  | 1000  | 0    | 0    | 0    | 3600  | 1900  | 2400  | 0     | 0              | 9200  | 3800  | 1300  | 0     | 2800  | 1000  | 0     | 4900  | 6600  | 1200  |
| WGA     | 14700                         | 9600  | 9800  | 10100 | 4600 | 2900 | 7100 | 15400 | 8900  | 8800  | 6800  | 17100          | 14600 | 16600 | 11700 | 6000  | 9100  | 13800 | 6700  | 18200 | 17200 | 1100  |
| GSL-IA4 | 0                             | 0     | 0     | 0     | 0    | 0    | 0    | 0     | 0     | 0     | 0     | 0              | 0     | 0     | 0     | 0     | 0     | 0     | 0     | 9900  | 0     | 0     |
| GSL-IB4 | 0                             | 0     | 0     | 0     | 0    | 0    | 0    | 0     | 0     | 0     | 0     | 0              | 0     | 0     | 0     | 0     | 0     | 0     | 0     | 4600  | 0     | 0     |
