# Supplementary material for: Multilectin-assisted fractionation for improved single-dot tissue glycome profiling in clinical glycoproteomics
Source: Royal Society of Chemistry journal article supplement (doi:10.1039/c3mb70430k), 2013-11-12

**Fig. S1** The proposal schematic overview of optimized serial multilectin affinity chromatography for CRC prognosis-specific glyco-biomarker discovery in further studies.

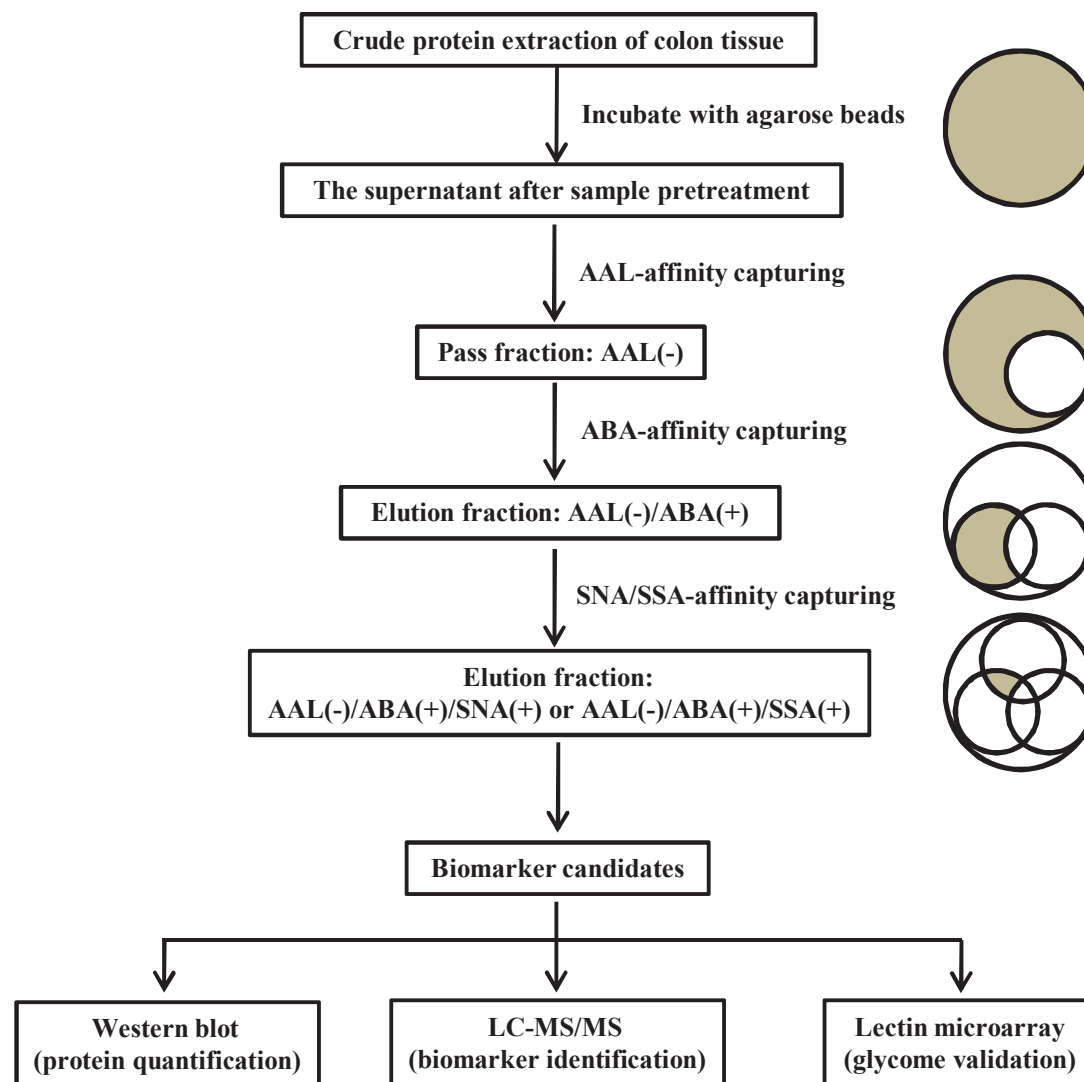

Supplement: c3mb70430k_6.pdf [file c3mb70430k_6.pdf]
