# Supplementary material for: Multilectin-assisted fractionation for improved single-dot tissue glycome profiling in clinical glycoproteomics
Source: Royal Society of Chemistry journal article supplement (doi:10.1039/c3mb70430k), 2013-11-12
Supplement: c3mb70430k_7.pdf [file c3mb70430k_7.pdf]

**Table S4 Clinical information of patients selected for lectin affinity capture.**

| Sample | Age | Male/Female | Location         | Diagnosis                 | TNM    | Stage | follow-up months | Survival state |
|--------|-----|-------------|------------------|---------------------------|--------|-------|------------------|----------------|
| A13    | 65  | M           | Sigmoid colon    | Moderately differentiated | T3N0M0 | IIA   | 128              | Alive          |
| A37    | 53  | F           | Transverse colon | Well differentiated       | T3N0M0 | IIA   | 123              | Alive          |
| A50    | 62  | M           | Sigmoid colon    | Moderately differentiated | T3N0M0 | IIA   | 121              | Alive          |
| A56    | 35  | M           | Rectum           | Moderately differentiated | T2N1M0 | IIIA  | 120              | Alive          |
| A35    | 63  | F           | Descending colon | Moderately differentiated | T3N1M0 | IIIB  | 124              | Alive          |
| A38    | 64  | M           | Sigmoid colon    | Moderately differentiated | T3N1M0 | IIIB  | 123              | Alive          |
| A53    | 75  | F           | Rectum           | Well differentiated       | T3N1M0 | IIIB  | 121              | Alive          |
| A55    | 56  | M           | Ascending colon  | Moderately differentiated | T3N1M0 | IIIB  | 121              | Alive          |
| A57    | 34  | M           | Ascending colon  | Moderately differentiated | T3N1M0 | IIIB  | 120              | Alive          |
| A12    | 65  | M           | Ascending colon  | Well differentiated       | T3N2M0 | IIIC  | 129              | Alive          |
| A33    | 52  | F           | Sigmoid colon    | Moderately differentiated | T2N2M0 | IIIC  | 124              | Alive          |
| D42    | 59  | M           | Ascending colon  | Moderately differentiated | T3N0M0 | IIA   | 35               | Dead           |
| D20    | 58  | M           | Cecum            | Moderately differentiated | T3N0M0 | IIA   | 35               | Dead           |
| D51    | 57  | M           | Sigmoid colon    | Moderately differentiated | T3N0M0 | IIA   | 83               | Dead           |
| D23    | 56  | M           | Ascending colon  | Moderately differentiated | T3N1M0 | IIIB  | 30               | Dead           |
| D29    | 45  | M           | Rectum           | Well differentiated       | T3N1M0 | IIIB  | 0                | Dead           |
| D10    | 68  | M           | Sigmoid colon    | Moderately differentiated | T3N1M0 | IIIB  | 60               | Dead           |
| D14    | 72  | F           | Sigmoid colon    | Well differentiated       | T3N1M0 | IIIB  | 34               | Dead           |
| D24    | 36  | M           | Transverse colon | Moderately differentiated | T3N2M0 | IIIC  | 2                | Dead           |
| D32    | 52  | M           | Rectum           | Moderately differentiated | T3N0M1 | IV    | 42               | Dead           |
| D19    | 57  | M           | Sigmoid colon    | Moderately differentiated | T3N0M1 | IV    | 7                | Dead           |
| D46    | 76  | M           | Sigmoid colon    | Moderately differentiated | T3N1M1 | IV    | 57               | Dead           |
