# Supplementary material for: Multilectin-assisted fractionation for improved single-dot tissue glycome profiling in clinical glycoproteomics
Source: Royal Society of Chemistry journal article supplement (doi:10.1039/c3mb70430k), 2013-11-12
Supplement: c3mb70430k_8.pdf [file c3mb70430k_8.pdf]

**Table S6 Clinical information of CRC patients selected for further analysis.**

| <b>Sample</b> | <b>Age</b> | <b>Male<br/>/Female</b> | <b>Location</b>  | <b>Diagnosis</b>          | <b>TNM</b> | <b>Stage</b> | <b>follow-up<br/>months</b> | <b>Survival state</b> |
|---------------|------------|-------------------------|------------------|---------------------------|------------|--------------|-----------------------------|-----------------------|
| A35           | 63         | F                       | Descending colon | Moderately differentiated | T3N1M0     | IIIB         | 124                         | Alive                 |
| A38           | 64         | M                       | Sigmoid colon    | Moderately differentiated | T3N1M0     | IIIB         | 123                         | Alive                 |
| A55           | 56         | M                       | Ascending colon  | Moderately differentiated | T3N1M0     | IIIB         | 121                         | Alive                 |
| A57           | 34         | M                       | Ascending colon  | Moderately differentiated | T3N1M0     | IIIB         | 120                         | Alive                 |
| A12           | 65         | M                       | Ascending colon  | Well differentiated       | T3N2M0     | IIIC         | 129                         | Alive                 |
| D23           | 56         | M                       | Ascending colon  | Moderately differentiated | T3N1M0     | IIIB         | 30                          | Dead                  |
| D29           | 45         | M                       | Rectum           | Well differentiated       | T3N1M0     | IIIB         | 0                           | Dead                  |
| D10           | 68         | M                       | Sigmoid colon    | Moderately differentiated | T3N1M0     | IIIB         | 60                          | Dead                  |
| D14           | 72         | F                       | Sigmoid colon    | Well differentiated       | T3N1M0     | IIIB         | 34                          | Dead                  |
| D24           | 36         | M                       | Transverse colon | Moderately differentiated | T3N2M0     | IIIC         | 2                           | Dead                  |
