# Supplementary material for: Multilectin-assisted fractionation for improved single-dot tissue glycome profiling in clinical glycoproteomics
Source: Royal Society of Chemistry journal article supplement (doi:10.1039/c3mb70430k), 2013-11-12
Supplement: c3mb70430k_9.pdf [file c3mb70430k_9.pdf]

**Table S7-1 Statistical analysis result of all of lectins between stage III CRC patients with good and poor prognoses based on lectin microarray combined with AAL and ABA-assisted fractionation**

|         | Input(-)                |                         |          | AAL(+)                  |                         |          | AAL(-)                  |                         |              | ABA(+)                  |                         |              | ABA(-)                  |                         |          |
|---------|-------------------------|-------------------------|----------|-------------------------|-------------------------|----------|-------------------------|-------------------------|--------------|-------------------------|-------------------------|--------------|-------------------------|-------------------------|----------|
|         | Good prognosis<br>(n=5) | Poor prognosis<br>(n=5) | <i>p</i> | Good prognosis<br>(n=5) | Poor prognosis<br>(n=5) | <i>p</i> | Good prognosis<br>(n=5) | Poor prognosis<br>(n=5) | <i>p</i>     | Good prognosis<br>(n=5) | Poor prognosis<br>(n=5) | <i>p</i>     | Good prognosis<br>(n=5) | Poor prognosis<br>(n=5) | <i>p</i> |
| LTL     | 0                       | 0                       | 0.814    | 0                       | 0                       | 0.637    | 0                       | 0                       | 0.881        | 0                       | 0                       | 0.814        | 0                       | 0                       | 0.881    |
| PSA     | 7100                    | 5800                    | 0.465    | 4900                    | 5800                    | 0.754    | 0                       | 0                       | 0.521        | 2700                    | 3200                    | 0.754        | 4500                    | 2600                    | 0.600    |
| LCA     | 7200                    | 6100                    | 0.530    | 6100                    | 6100                    | 0.675    | 0                       | 0                       | 0.521        | 2000                    | 2900                    | 1.000        | 4300                    | 3200                    | 0.753    |
| UEA-I   | 0                       | 1100                    | 0.054    | 0                       | 1100                    | 0.054    | 0                       | 0                       | 1.000        | 0                       | 1100                    | 0.054        | 0                       | 0                       | 0.317    |
| AOL     | 23700                   | 15700                   | 0.347    | 23700                   | 15700                   | 0.347    | 0                       | 0                       | 0.317        | 8100                    | 8800                    | 0.917        | 16500                   | 10800                   | 0.251    |
| AAL     | 23400                   | 16400                   | 0.347    | 23400                   | 16400                   | 0.347    | 0                       | 0                       | 1.000        | 9300                    | 9400                    | 0.917        | 14500                   | 9700                    | 0.175    |
| MAL     | 0                       | 2200                    | 0.131    | 0                       | 2200                    | 0.131    | 0                       | 0                       | 1.000        | 0                       | 2200                    | 0.131        | 0                       | 0                       | 0.317    |
| SNA     | 19000                   | 20200                   | 0.347    | 14800                   | 13400                   | 0.602    | 0                       | 8800                    | <b>0.147</b> | 4100                    | 8500                    | <b>0.093</b> | 11500                   | 12600                   | 0.754    |
| SSA     | 19200                   | 22700                   | 0.251    | 17000                   | 14800                   | 0.754    | 0                       | 8200                    | <b>0.147</b> | 5400                    | 9100                    | <b>0.076</b> | 13300                   | 14200                   | 0.602    |
| TJA-I   | 29200                   | 31700                   | 0.347    | 23500                   | 21200                   | 0.602    | 0                       | 15000                   | 0.147        | 6700                    | 11200                   | 0.076        | 17300                   | 21100                   | 0.465    |
| PHA-L   | 0                       | 1800                    | 0.147    | 0                       | 1800                    | 0.147    | 0                       | 0                       | 1.000        | 0                       | 1800                    | 0.034        | 0                       | 0                       | 0.881    |
| ECA     | 1600                    | 1700                    | 0.599    | 1600                    | 1700                    | 0.527    | 0                       | 0                       | 0.881        | 1600                    | 1700                    | 0.462        | 0                       | 0                       | 0.881    |
| RCA120  | 7900                    | 15600                   | 0.117    | 6700                    | 15000                   | 0.116    | 0                       | 0                       | 0.368        | 3600                    | 6900                    | 0.175        | 3800                    | 3600                    | 0.917    |
| PHA-E   | 7200                    | 9700                    | 0.117    | 7200                    | 9700                    | 0.117    | 0                       | 0                       | 1.000        | 4900                    | 9700                    | 0.117        | 1600                    | 2500                    | 0.916    |
| DSA     | 32500                   | 35500                   | 0.463    | 32500                   | 33700                   | 0.602    | 0                       | 5400                    | 0.095        | 12100                   | 17200                   | 0.117        | 21900                   | 20600                   | 0.917    |
| GSL-II  | 0                       | 0                       | 1.000    | 0                       | 0                       | 1.000    | 0                       | 0                       | 1.000        | 0                       | 0                       | 1.000        | 0                       | 0                       | 1.000    |
| NPA     | 2200                    | 3700                    | 0.347    | 1000                    | 2400                    | 0.251    | 0                       | 1500                    | 0.095        | 1000                    | 2700                    | 0.175        | 1400                    | 1000                    | 0.669    |
| ConA    | 12500                   | 12200                   | 0.917    | 10000                   | 8600                    | 0.754    | 0                       | 6100                    | 0.147        | 6500                    | 5400                    | 0.754        | 7200                    | 6800                    | 0.834    |
| GNA     | 2900                    | 2700                    | 0.602    | 1900                    | 2700                    | 0.251    | 0                       | 0                       | 0.317        | 1900                    | 2200                    | 0.347        | 0                       | 1100                    | 0.410    |
| HHL     | 1700                    | 2600                    | 0.746    | 1700                    | 2600                    | 0.746    | 0                       | 0                       | 1.000        | 1700                    | 2600                    | 0.746        | 0                       | 0                       | 0.906    |
| ACG     | 6700                    | 7000                    | 0.675    | 5300                    | 4900                    | 0.917    | 0                       | 1300                    | 0.196        | 2600                    | 2900                    | 0.602        | 2500                    | 3500                    | 0.834    |
| TxLC-I  | 0                       | 1700                    | 0.057    | 0                       | 1700                    | 0.057    | 0                       | 0                       | 1.000        | 0                       | 1700                    | 0.057        | 0                       | 0                       | 1.000    |
| BPL     | 1900                    | 5900                    | 0.602    | 1900                    | 5900                    | 0.602    | 0                       | 0                       | 1.000        | 1500                    | 5300                    | 0.465        | 0                       | 0                       | 1.000    |
| TJA-II  | 3200                    | 8100                    | 0.059    | 3200                    | 8100                    | 0.059    | 0                       | 0                       | 0.317        | 2000                    | 8100                    | 0.059        | 0                       | 0                       | 0.521    |
| EEL     | 0                       | 0                       | 0.317    | 0                       | 0                       | 0.317    | 0                       | 0                       | 1.000        | 0                       | 0                       | 0.317        | 0                       | 0                       | 1.000    |
| ABA     | 7100                    | 9800                    | 0.173    | 7100                    | 7900                    | 0.347    | 0                       | 2300                    | <b>0.058</b> | 7100                    | 9800                    | 0.173        | 0                       | 0                       | 1.000    |
| LEL     | 37000                   | 49600                   | 0.754    | 37000                   | 43700                   | 0.917    | 0                       | 8500                    | 0.220        | 10400                   | 20400                   | 0.251        | 27000                   | 22400                   | 0.465    |
| STL     | 27900                   | 38500                   | 0.347    | 25300                   | 29600                   | 0.465    | 0                       | 4800                    | 0.147        | 9600                    | 11200                   | 0.347        | 16600                   | 15100                   | 0.917    |
| UDA     | 24500                   | 21000                   | 0.754    | 22100                   | 14800                   | 0.465    | 0                       | 7300                    | 0.147        | 9100                    | 8000                    | 0.600        | 15600                   | 13000                   | 0.402    |
| PWM     | 6200                    | 6400                    | 0.347    | 1700                    | 4400                    | 0.917    | 0                       | 4300                    | 0.095        | 1800                    | 1900                    | 0.459        | 3300                    | 4500                    | 0.173    |
| Jacalin | 5700                    | 10100                   | 0.251    | 5700                    | 8500                    | 0.465    | 0                       | 1700                    | 0.095        | 5700                    | 10100                   | 0.251        | 0                       | 0                       | 1.000    |
| PNA     | 0                       | 0                       | 1.000    | 0                       | 0                       | 1.000    | 0                       | 0                       | 1.000        | 0                       | 0                       | 1.000        | 0                       | 0                       | 1.000    |
| WFA     | 1400                    | 2400                    | 0.245    | 1400                    | 2400                    | 0.245    | 0                       | 0                       | 1.000        | 300                     | 2400                    | 0.169        | 0                       | 0                       | 0.317    |
| ACA     | 2000                    | 5500                    | 0.463    | 2000                    | 5500                    | 0.463    | 0                       | 0                       | 1.000        | 2000                    | 5500                    | 0.463        | 0                       | 0                       | 0.317    |
| MPA     | 1100                    | 1700                    | 0.449    | 1100                    | 1700                    | 0.449    | 0                       | 0                       | 1.000        | 1100                    | 1700                    | 0.449        | 0                       | 0                       | 1.000    |
| HPA     | 0                       | 0                       | 0.317    | 0                       | 0                       | 0.317    | 0                       | 0                       | 1.000        | 0                       | 0                       | 0.317        | 0                       | 0                       | 1.000    |
| VVA     | 0                       | 0                       | 1.000    | 0                       | 0                       | 1.000    | 0                       | 0                       | 1.000        | 0                       | 0                       | 1.000        | 0                       | 0                       | 1.000    |
| DBA     | 0                       | 0                       | 0.317    | 0                       | 0                       | 0.317    | 0                       | 0                       | 1.000        | 0                       | 0                       | 0.317        | 0                       | 0                       | 1.000    |
| SBA     | 0                       | 0                       | 0.317    | 0                       | 0                       | 0.317    | 0                       | 0                       | 1.000        | 0                       | 0                       | 0.317        | 0                       | 0                       | 1.000    |
| Calsepa | 10200                   | 8300                    | 0.917    | 5900                    | 5900                    | 1.000    | 0                       | 2600                    | 0.147        | 2500                    | 3600                    | 0.530        | 6300                    | 5100                    | 0.346    |
| PTL-I   | 0                       | 0                       | 1.000    | 0                       | 0                       | 1.000    | 0                       | 0                       | 1.000        | 0                       | 0                       | 1.000        | 0                       | 0                       | 1.000    |
| MAH     | 1000                    | 1300                    | 0.451    | 200                     | 1300                    | 0.332    | 0                       | 0                       | 0.881        | 1000                    | 1300                    | 0.451        | 0                       | 0                       | 1.000    |
| WGA     | 11900                   | 18800                   | 0.142    | 11900                   | 18800                   | 0.142    | 0                       | 0                       | 0.317        | 8900                    | 14600                   | 0.251        | 2900                    | 3900                    | 1.000    |
| GSL-IA4 | 0                       | 0                       | 1.000    | 0                       | 0                       | 1.000    | 0                       | 0                       | 1.000        | 0                       | 0                       | 1.000        | 0                       | 0                       | 1.000    |
| GSL-IB4 | 0                       | 0                       | 1.000    | 0                       | 0                       | 1.000    | 0                       | 0                       | 1.000        | 0                       | 0                       | 1.000        | 0                       | 0                       | 1.000    |

The values were presented as the median after gain-merging. *p*-values in bold indicate statistical significance by Mann-Whitney U test.

**Table S7-2 Statistical analysis result of all of lectins between stage III CRC patients with good and poor prognoses based on lectin microarray combined with AAL and ABA-assisted fractionation**

|         | Input          |       |       |       |       |                |       |       |       |       |
|---------|----------------|-------|-------|-------|-------|----------------|-------|-------|-------|-------|
|         | Good prognosis |       |       |       |       | Poor prognosis |       |       |       |       |
|         | 1              | 4     | 7     | 9     | 11    | 1              | 2     | 4     | 5     | 10    |
| LTL     | 0              | 1000  | 0     | 5000  | 0     | 1400           | 7500  | 0     | 0     | 0     |
| PSA     | 7100           | 10500 | 4300  | 7500  | 4900  | 5900           | 24800 | 5800  | 3300  | 3000  |
| LCA     | 7200           | 10100 | 4500  | 8100  | 6100  | 6200           | 26100 | 6100  | 3300  | 4900  |
| UEA-I   | 0              | 0     | 0     | 0     | 0     | 3600           | 7000  | 0     | 0     | 1100  |
| AOL     | 29700          | 23500 | 20100 | 30500 | 23700 | 27800          | 54000 | 15700 | 10500 | 14200 |
| AAL     | 26000          | 22800 | 21700 | 30200 | 23400 | 25900          | 45800 | 16400 | 9300  | 15100 |
| MAL     | 1200           | 0     | 0     | 2000  | 0     | 1000           | 6000  | 2200  | 0     | 3600  |
| SNA     | 19000          | 14800 | 11300 | 21000 | 19800 | 19200          | 36800 | 20200 | 10900 | 25500 |
| SSA     | 19200          | 17000 | 10900 | 25200 | 21600 | 20500          | 44500 | 22700 | 13200 | 26900 |
| TJA-I   | 29200          | 23500 | 19600 | 35800 | 31800 | 29600          | 67600 | 31700 | 21200 | 39300 |
| PHA-L   | 0              | 0     | 0     | 2800  | 0     | 1900           | 5900  | 1400  | 0     | 1800  |
| ECA     | 1700           | 1600  | 0     | 3700  | 1000  | 2300           | 13000 | 1500  | 0     | 1700  |
| RCA120  | 12400          | 5700  | 4500  | 7900  | 9600  | 16400          | 17500 | 11600 | 4700  | 15600 |
| PHA-E   | 7300           | 5200  | 3500  | 7900  | 7200  | 9700           | 14900 | 8700  | 2400  | 17600 |
| DSA     | 32500          | 28600 | 27200 | 43100 | 39200 | 35500          | 57800 | 35500 | 21500 | 48800 |
| GSL-II  | 0              | 0     | 0     | 0     | 0     | 0              | 0     | 0     | 0     | 0     |
| NPA     | 4600           | 6800  | 0     | 2200  | 1000  | 10600          | 10800 | 3700  | 1700  | 2100  |
| ConA    | 12500          | 14700 | 8400  | 20300 | 10000 | 14300          | 35100 | 12200 | 8600  | 10200 |
| GNA     | 2900           | 3200  | 0     | 3400  | 1900  | 9300           | 7500  | 2200  | 1300  | 2700  |
| HHL     | 6800           | 8900  | 1700  | 0     | 0     | 10400          | 8500  | 2600  | 0     | 0     |
| ACG     | 7500           | 2900  | 1800  | 6700  | 8400  | 6700           | 7000  | 7600  | 1600  | 11900 |
| TxLC-I  | 1400           | 0     | 0     | 0     | 0     | 3900           | 3900  | 1200  | 0     | 1700  |
| BPL     | 8600           | 4700  | 1500  | 1900  | 1400  | 13100          | 7400  | 1600  | 0     | 5900  |
| TJA-II  | 5700           | 2000  | 0     | 3200  | 3700  | 8100           | 11400 | 6800  | 2000  | 11300 |
| EEL     | 0              | 0     | 0     | 0     | 0     | 0              | 0     | 1000  | 0     | 0     |
| ABA     | 9100           | 7200  | 4400  | 4400  | 7100  | 9800           | 17500 | 7400  | 2400  | 14100 |
| LEL     | 48800          | 31600 | 22600 | 64400 | 37000 | 49600          | 55900 | 33100 | 20600 | 60600 |
| STL     | 28100          | 20700 | 18600 | 33500 | 27900 | 39500          | 38500 | 25200 | 12400 | 39400 |
| UDA     | 28300          | 26600 | 22100 | 24500 | 14000 | 28400          | 45000 | 21000 | 10600 | 13800 |
| PWM     | 7500           | 6800  | 1700  | 6200  | 1600  | 12300          | 12600 | 6400  | 4400  | 4700  |
| Jacalin | 10000          | 8100  | 3900  | 4200  | 5700  | 10100          | 12900 | 7200  | 3000  | 22500 |
| PNA     | 0              | 0     | 0     | 0     | 0     | 0              | 0     | 0     | 0     | 0     |
| WFA     | 2300           | 0     | 0     | 1400  | 1500  | 6200           | 2800  | 2400  | 0     | 1100  |
| ACA     | 6000           | 2500  | 1700  | 1700  | 2000  | 7200           | 5500  | 1900  | 0     | 13800 |
| MPA     | 1800           | 1100  | 0     | 0     | 1100  | 3700           | 1700  | 0     | 0     | 9200  |
| HPA     | 0              | 0     | 0     | 0     | 0     | 0              | 2300  | 0     | 0     | 0     |
| VVA     | 0              | 0     | 0     | 0     | 0     | 0              | 0     | 0     | 0     | 0     |
| DBA     | 0              | 0     | 0     | 0     | 0     | 0              | 5400  | 0     | 0     | 0     |
| SBA     | 0              | 0     | 0     | 0     | 0     | 1300           | 0     | 0     | 0     | 0     |
| Calsepa | 10200          | 12400 | 5900  | 11700 | 4700  | 12300          | 26800 | 8300  | 5200  | 2200  |
| PTL-I   | 0              | 0     | 0     | 0     | 0     | 0              | 0     | 0     | 0     | 0     |
| MAH     | 1200           | 1000  | 0     | 1900  | 0     | 0              | 9200  | 1300  | 0     | 6600  |
| WGA     | 17600          | 10100 | 9000  | 16900 | 11900 | 18800          | 20500 | 17600 | 6000  | 21100 |
| GSL-IA4 | 0              | 0     | 0     | 0     | 0     | 0              | 0     | 0     | 0     | 0     |
| GSL-IB4 | 0              | 0     | 0     | 0     | 0     | 0              | 0     | 0     | 0     | 0     |

The values were presented as the median after gain-merging. *p*-values in bold indicate statistical significance by Mann-Whitney U test.

**Table S7-3 Statistical analysis result of all of lectins between stage III CRC patients with good and poor prognoses based on lectin microarray combined with AAL and ABA-assisted fractionation**

|         | AAL elution fraction (AAL(+)) |       |       |       |       |                |       |       |       |       | AAL pass fraction (AAL(-)) |   |   |       |    |                |       |       |   |       |
|---------|-------------------------------|-------|-------|-------|-------|----------------|-------|-------|-------|-------|----------------------------|---|---|-------|----|----------------|-------|-------|---|-------|
|         | Good prognosis                |       |       |       |       | Poor prognosis |       |       |       |       | Good prognosis             |   |   |       |    | Poor prognosis |       |       |   |       |
|         | 1                             | 4     | 7     | 9     | 11    | 1              | 2     | 4     | 5     | 10    | 1                          | 4 | 7 | 9     | 11 | 1              | 2     | 4     | 5 | 10    |
| LTL     | 0                             | 1000  | 0     | 1000  | 0     | 1400           | 4500  | 0     | 0     | 0     | 0                          | 0 | 0 | 4000  | 0  | 0              | 3000  | 0     | 0 | 0     |
| PSA     | 7100                          | 10500 | 4300  | 4500  | 4900  | 5900           | 18500 | 5800  | 3300  | 1800  | 0                          | 0 | 0 | 3000  | 0  | 0              | 6300  | 0     | 0 | 1200  |
| LCA     | 7200                          | 10100 | 4500  | 5100  | 6100  | 6200           | 18900 | 6100  | 3300  | 3400  | 0                          | 0 | 0 | 3000  | 0  | 0              | 7200  | 0     | 0 | 1500  |
| UEA-I   | 0                             | 0     | 0     | 0     | 0     | 3600           | 7000  | 0     | 0     | 1100  | 0                          | 0 | 0 | 0     | 0  | 0              | 0     | 0     | 0 | 0     |
| AOL     | 29700                         | 23500 | 20100 | 30500 | 23700 | 27800          | 52600 | 15700 | 10500 | 14200 | 0                          | 0 | 0 | 0     | 0  | 0              | 1400  | 0     | 0 | 0     |
| AAL     | 26000                         | 22800 | 21700 | 30200 | 23400 | 25900          | 45800 | 16400 | 9300  | 15100 | 0                          | 0 | 0 | 0     | 0  | 0              | 0     | 0     | 0 | 0     |
| MAL     | 1200                          | 0     | 0     | 2000  | 0     | 1000           | 6000  | 2200  | 0     | 3600  | 0                          | 0 | 0 | 0     | 0  | 0              | 0     | 0     | 0 | 0     |
| SNA     | 19000                         | 14800 | 11300 | 4400  | 19800 | 16100          | 13600 | 11400 | 10900 | 13400 | 0                          | 0 | 0 | 16600 | 0  | 3100           | 23200 | 8800  | 0 | 12100 |
| SSA     | 19200                         | 17000 | 10900 | 6700  | 21600 | 17400          | 21900 | 14500 | 13200 | 14800 | 0                          | 0 | 0 | 18500 | 0  | 3100           | 22600 | 8200  | 0 | 12100 |
| TJA-I   | 29200                         | 23500 | 19600 | 7800  | 31800 | 22900          | 31200 | 16700 | 21200 | 18200 | 0                          | 0 | 0 | 28000 | 0  | 6700           | 36400 | 15000 | 0 | 21100 |
| PHA-L   | 0                             | 0     | 0     | 2800  | 0     | 1900           | 5900  | 1400  | 0     | 1800  | 0                          | 0 | 0 | 0     | 0  | 0              | 0     | 0     | 0 | 0     |
| ECA     | 1700                          | 1600  | 0     | 2300  | 1000  | 2300           | 8800  | 1500  | 0     | 1700  | 0                          | 0 | 0 | 1400  | 0  | 0              | 4200  | 0     | 0 | 0     |
| RCA120  | 12400                         | 5700  | 4500  | 6700  | 9600  | 15000          | 15000 | 11600 | 4700  | 15600 | 0                          | 0 | 0 | 1200  | 0  | 1400           | 2500  | 0     | 0 | 0     |
| PHA-E   | 7300                          | 5200  | 3500  | 7900  | 7200  | 9700           | 14900 | 8700  | 2400  | 17600 | 0                          | 0 | 0 | 0     | 0  | 0              | 0     | 0     | 0 | 0     |
| DSA     | 32500                         | 28600 | 27200 | 37000 | 39200 | 33700          | 45600 | 28900 | 21500 | 43400 | 0                          | 0 | 0 | 6100  | 0  | 1800           | 12200 | 6600  | 0 | 5400  |
| GSL-II  | 0                             | 0     | 0     | 0     | 0     | 0              | 0     | 0     | 0     | 0     | 0                          | 0 | 0 | 0     | 0  | 0              | 0     | 0     | 0 | 0     |
| NPA     | 4600                          | 6800  | 0     | 500   | 1000  | 8800           | 7500  | 2400  | 1700  | 600   | 0                          | 0 | 0 | 1700  | 0  | 1800           | 3300  | 1300  | 0 | 1500  |
| ConA    | 12500                         | 14700 | 8400  | 5800  | 10000 | 10200          | 17500 | 6100  | 8600  | 1400  | 0                          | 0 | 0 | 14500 | 0  | 4100           | 17600 | 6100  | 0 | 8800  |
| GNA     | 2900                          | 3200  | 0     | 1000  | 1900  | 9300           | 7500  | 2200  | 1300  | 2700  | 0                          | 0 | 0 | 2400  | 0  | 0              | 0     | 0     | 0 | 0     |
| HHL     | 6800                          | 8900  | 1700  | 0     | 0     | 10400          | 8500  | 2600  | 0     | 0     | 0                          | 0 | 0 | 0     | 0  | 0              | 0     | 0     | 0 | 0     |
| ACG     | 7500                          | 2900  | 1800  | 5300  | 8400  | 6700           | 4900  | 4800  | 1600  | 10600 | 0                          | 0 | 0 | 1400  | 0  | 0              | 2100  | 2800  | 0 | 1300  |
| TxLC-I  | 1400                          | 0     | 0     | 0     | 0     | 3900           | 3900  | 1200  | 0     | 1700  | 0                          | 0 | 0 | 0     | 0  | 0              | 0     | 0     | 0 | 0     |
| BPL     | 8600                          | 4700  | 1500  | 1900  | 1400  | 13100          | 7400  | 1600  | 0     | 5900  | 0                          | 0 | 0 | 0     | 0  | 0              | 0     | 0     | 0 | 0     |
| TJA-II  | 5700                          | 2000  | 0     | 3200  | 3700  | 8100           | 10400 | 6800  | 2000  | 11300 | 0                          | 0 | 0 | 0     | 0  | 0              | 1000  | 0     | 0 | 0     |
| EEL     | 0                             | 0     | 0     | 0     | 0     | 0              | 0     | 1000  | 0     | 0     | 0                          | 0 | 0 | 0     | 0  | 0              | 0     | 0     | 0 | 0     |
| ABA     | 9100                          | 7200  | 4400  | 2300  | 7100  | 7900           | 12200 | 5100  | 2400  | 10900 | 0                          | 0 | 0 | 2100  | 0  | 1900           | 5300  | 2300  | 0 | 3200  |
| LEL     | 48800                         | 31600 | 22600 | 51200 | 37000 | 44700          | 43700 | 24600 | 20600 | 51300 | 0                          | 0 | 0 | 13200 | 0  | 4900           | 12200 | 8500  | 0 | 9300  |
| STL     | 28100                         | 20700 | 18600 | 25300 | 27900 | 31900          | 29600 | 20400 | 12400 | 35200 | 0                          | 0 | 0 | 8200  | 0  | 7600           | 8900  | 4800  | 0 | 4200  |
| UDA     | 28300                         | 26600 | 22100 | 9900  | 14000 | 20800          | 27800 | 14800 | 10600 | 6500  | 0                          | 0 | 0 | 14600 | 0  | 7600           | 17200 | 6200  | 0 | 7300  |
| PWM     | 7500                          | 6800  | 1700  | 1200  | 1600  | 5500           | 7300  | 2500  | 4400  | 400   | 0                          | 0 | 0 | 5000  | 0  | 6800           | 5300  | 3900  | 0 | 4300  |
| Jacalin | 10000                         | 8100  | 3900  | 1500  | 5700  | 8500           | 8900  | 5500  | 3000  | 18800 | 0                          | 0 | 0 | 2700  | 0  | 1600           | 4000  | 1700  | 0 | 3700  |
| PNA     | 0                             | 0     | 0     | 0     | 0     | 0              | 0     | 0     | 0     | 0     | 0                          | 0 | 0 | 0     | 0  | 0              | 0     | 0     | 0 | 0     |
| WFA     | 2300                          | 0     | 0     | 1400  | 1500  | 6200           | 2800  | 2400  | 0     | 1100  | 0                          | 0 | 0 | 0     | 0  | 0              | 0     | 0     | 0 | 0     |
| ACA     | 6000                          | 2500  | 1700  | 1700  | 2000  | 7200           | 5500  | 1900  | 0     | 13800 | 0                          | 0 | 0 | 0     | 0  | 0              | 0     | 0     | 0 | 0     |
| MPA     | 1800                          | 1100  | 0     | 0     | 1100  | 3700           | 1700  | 0     | 0     | 9200  | 0                          | 0 | 0 | 0     | 0  | 0              | 0     | 0     | 0 | 0     |
| HPA     | 0                             | 0     | 0     | 0     | 0     | 0              | 2300  | 0     | 0     | 0     | 0                          | 0 | 0 | 0     | 0  | 0              | 0     | 0     | 0 | 0     |
| VVA     | 0                             | 0     | 0     | 0     | 0     | 0              | 0     | 0     | 0     | 0     | 0                          | 0 | 0 | 0     | 0  | 0              | 0     | 0     | 0 | 0     |
| DBA     | 0                             | 0     | 0     | 0     | 0     | 0              | 5400  | 0     | 0     | 0     | 0                          | 0 | 0 | 0     | 0  | 0              | 0     | 0     | 0 | 0     |
| SBA     | 0                             | 0     | 0     | 0     | 0     | 1300           | 0     | 0     | 0     | 0     | 0                          | 0 | 0 | 0     | 0  | 0              | 0     | 0     | 0 | 0     |
| Calsepa | 10200                         | 12400 | 5900  | 2400  | 4700  | 9700           | 15700 | 5900  | 5200  | -1900 | 0                          | 0 | 0 | 9300  | 0  | 2600           | 11100 | 2400  | 0 | 4100  |
| PTL-I   | 0                             | 0     | 0     | 0     | 0     | 0              | 0     | 0     | 0     | 0     | 0                          | 0 | 0 | 0     | 0  | 0              | 0     | 0     | 0 | 0     |
| MAH     | 1200                          | 1000  | 0     | 200   | 0     | 0              | 6100  | 1300  | 0     | 6600  | 0                          | 0 | 0 | 1700  | 0  | 0              | 3100  | 0     | 0 | 0     |
| WGA     | 17600                         | 10100 | 9000  | 16900 | 11900 | 18800          | 20500 | 17600 | 6000  | 19900 | 0                          | 0 | 0 | 0     | 0  | 0              | 0     | 0     | 0 | 1200  |
| GSL-IA4 | 0                             | 0     | 0     | 0     | 0     | 0              | 0     | 0     | 0     | 0     | 0                          | 0 | 0 | 0     | 0  | 0              | 0     | 0     | 0 | 0     |
| GSL-IB4 | 0                             | 0     | 0     | 0     | 0     | 0              | 0     | 0     | 0     | 0     | 0                          | 0 | 0 | 0     | 0  | 0              | 0     | 0     | 0 | 0     |

The values were presented as the median after gain-merging. *p*-values in bold indicate statistical significance by Mann-Whitney U test.

**Table S7-4 Statistical analysis result of all of lectins between stage III CRC patients with good and poor prognoses based on lectin microarray combined with AAL and ABA-assisted fractionation**

|         | ABA elution fraction (ABA(+)) |       |      |       |       |                |       |       |       |       | ABA pass fraction (ABA(-)) |       |       |       |       |                |       |       |       |       |
|---------|-------------------------------|-------|------|-------|-------|----------------|-------|-------|-------|-------|----------------------------|-------|-------|-------|-------|----------------|-------|-------|-------|-------|
|         | Good prognosis                |       |      |       |       | Poor prognosis |       |       |       |       | Good prognosis             |       |       |       |       | Poor prognosis |       |       |       |       |
|         | 1                             | 4     | 7    | 9     | 11    | 1              | 2     | 4     | 5     | 10    | 1                          | 4     | 7     | 9     | 11    | 1              | 2     | 4     | 5     | 10    |
| LTL     | 0                             | 1000  | 0    | 2900  | 0     | 1400           | 5900  | 0     | 0     | 0     | 0                          | 0     | 0     | 2100  | 0     | 0              | 1600  | 0     | 0     | 0     |
| PSA     | 4300                          | 5400  | 2700 | 1400  | 400   | 4500           | 14300 | 3200  | 1900  | -2700 | 2800                       | 5100  | 1600  | 6100  | 4500  | 1400           | 10500 | 2600  | 1400  | 5700  |
| LCA     | 4400                          | 5400  | 1700 | 2000  | 1800  | 4900           | 14100 | 2900  | 1700  | -500  | 2800                       | 4700  | 2800  | 6100  | 4300  | 1300           | 12000 | 3200  | 1600  | 5400  |
| UEA-I   | 0                             | 0     | 0    | 0     | 0     | 3600           | 5800  | 0     | 0     | 1100  | 0                          | 0     | 0     | 0     | 0     | 0              | 1200  | 0     | 0     | 0     |
| AOL     | 13100                         | 11400 | 8100 | 7300  | 7200  | 15400          | 24900 | 8800  | 5200  | 3400  | 16600                      | 12100 | 12000 | 23200 | 16500 | 12400          | 29100 | 6900  | 5300  | 10800 |
| AAL     | 11500                         | 11800 | 9300 | 7500  | 6600  | 14600          | 20500 | 9400  | 5300  | 5400  | 14500                      | 11000 | 12400 | 22700 | 16800 | 11300          | 25300 | 7000  | 4000  | 9700  |
| MAL     | 1200                          | 0     | 0    | 2000  | 0     | 1000           | 4500  | 2200  | 0     | 3600  | 0                          | 0     | 0     | 0     | 0     | 0              | 1500  | 0     | 0     | 0     |
| SNA     | 7500                          | 7600  | 2800 | 4100  | 4100  | 10500          | 8500  | 7600  | 3900  | 9300  | 11500                      | 7200  | 8500  | 16900 | 15700 | 8700           | 28300 | 12600 | 7000  | 16200 |
| SSA     | 5900                          | 8600  | 2300 | 4000  | 5400  | 11300          | 14400 | 8500  | 4700  | 9100  | 13300                      | 8400  | 8600  | 21200 | 16200 | 9200           | 30100 | 14200 | 8500  | 17800 |
| TJA-I   | 11900                         | 10500 | 6700 | 6300  | 5600  | 14500          | 19000 | 10600 | 7100  | 11200 | 17300                      | 13000 | 12900 | 29500 | 26200 | 15100          | 48600 | 21100 | 14100 | 28100 |
| PHA-L   | 0                             | 0     | 0    | 1300  | 0     | 1900           | 4800  | 1400  | 0     | 1800  | 0                          | 0     | 0     | 1500  | 0     | 0              | 1100  | 0     | 0     | 0     |
| ECA     | 1700                          | 1600  | 0    | 2200  | 1000  | 2300           | 9400  | 1500  | 0     | 1700  | 0                          | 0     | 0     | 1500  | 0     | 0              | 3600  | 0     | 0     | 0     |
| RCA120  | 8600                          | 3600  | 1500 | 2500  | 3800  | 13200          | 3700  | 6900  | 3500  | 12000 | 3800                       | 2100  | 3000  | 5400  | 5800  | 3200           | 13800 | 4700  | 1200  | 3600  |
| PHA-E   | 5700                          | 5200  | 2500 | 2600  | 4900  | 9700           | 10500 | 6200  | 2400  | 14400 | 1600                       | 0     | 1000  | 5300  | 2300  | 0              | 4400  | 2500  | 0     | 3200  |
| DSA     | 10600                         | 12100 | 9300 | 15000 | 14500 | 17200          | 21200 | 13500 | 11900 | 28200 | 21900                      | 16500 | 17900 | 28100 | 24700 | 18300          | 36600 | 22000 | 9600  | 20600 |
| GSL-II  | 0                             | 0     | 0    | 0     | 0     | 0              | 0     | 0     | 0     | 0     | 0                          | 0     | 0     | 0     | 0     | 0              | 0     | 0     | 0     | 0     |
| NPA     | 3200                          | 4900  | 0    | 800   | 1000  | 8700           | 7200  | 2700  | 1700  | 1100  | 1400                       | 1900  | 0     | 1400  | 0     | 1900           | 3600  | 1000  | 0     | 1000  |
| ConA    | 7200                          | 6500  | 2700 | 7900  | 2800  | 9000           | 17800 | 5400  | 3500  | 1400  | 5300                       | 8200  | 5700  | 12400 | 7200  | 5300           | 17300 | 6800  | 5100  | 8800  |
| GNA     | 2900                          | 3200  | 0    | 1200  | 1900  | 7700           | 5600  | 2200  | 1300  | 1600  | 0                          | 0     | 0     | 2200  | 0     | 1600           | 1900  | 0     | 0     | 1100  |
| HHL     | 4600                          | 6800  | 1700 | 0     | 0     | 7300           | 6400  | 2600  | 0     | 0     | 2200                       | 2100  | 0     | 0     | 0     | 3100           | 2100  | 0     | 0     | 0     |
| ACG     | 5000                          | 1800  | 200  | 2600  | 3200  | 6700           | 2900  | 2300  | -200  | 8400  | 2500                       | 1100  | 1600  | 4100  | 5200  | 0              | 4100  | 5300  | 1800  | 3500  |
| TxLC-I  | 1400                          | 0     | 0    | 0     | 0     | 3900           | 3900  | 1200  | 0     | 1700  | 0                          | 0     | 0     | 0     | 0     | 0              | 0     | 0     | 0     | 0     |
| BPL     | 6400                          | 4700  | 1500 | 800   | 1400  | 11300          | 5300  | 1600  | 0     | 5900  | 2200                       | 0     | 0     | 1100  | 0     | 1800           | 2100  | 0     | 0     | 0     |
| TJA-II  | 5700                          | 2000  | 0    | 1400  | 3700  | 8100           | 9500  | 5200  | 2000  | 11300 | 0                          | 0     | 0     | 1800  | 0     | 0              | 1900  | 1600  | 0     | 0     |
| EEL     | 0                             | 0     | 0    | 0     | 0     | 0              | 0     | 1000  | 0     | 0     | 0                          | 0     | 0     | 0     | 0     | 0              | 0     | 0     | 0     | 0     |
| ABA     | 9100                          | 7200  | 4400 | 4400  | 7100  | 9800           | 17500 | 7400  | 2400  | 14100 | 0                          | 0     | 0     | 0     | 0     | 0              | 0     | 0     | 0     | 0     |
| LEL     | 19900                         | 10400 | 7400 | 24400 | 10000 | 28900          | 20400 | 10700 | 9900  | 35100 | 28900                      | 21200 | 15200 | 40000 | 27000 | 20700          | 35500 | 22400 | 10700 | 25500 |
| STL     | 11500                         | 10200 | 6800 | 7300  | 9600  | 19100          | 11200 | 10100 | 5400  | 26900 | 16600                      | 10500 | 11800 | 26200 | 18300 | 20400          | 27300 | 15100 | 7000  | 12500 |
| UDA     | 10200                         | 13000 | 9100 | 600   | -1600 | 12000          | 15500 | 8000  | 3000  | 3000  | 18100                      | 13600 | 13000 | 23900 | 15600 | 16400          | 29500 | 13000 | 7600  | 10800 |
| PWM     | 4200                          | 2600  | 1700 | 1800  | 0     | 6400           | 6700  | 1900  | 1700  | 1700  | 3300                       | 4200  | 0     | 4400  | 1600  | 5900           | 5900  | 4500  | 2700  | 3000  |
| Jacalin | 10000                         | 8100  | 3900 | 4200  | 5700  | 10100          | 12900 | 7200  | 3000  | 22500 | 0                          | 0     | 0     | 0     | 0     | 0              | 0     | 0     | 0     | 0     |
| PNA     | 0                             | 0     | 0    | 0     | 0     | 0              | 0     | 0     | 0     | 0     | 0                          | 0     | 0     | 0     | 0     | 0              | 0     | 0     | 0     | 0     |
| WFA     | 2300                          | 0     | 0    | 300   | 1500  | 6200           | 2800  | 2400  | 0     | 1100  | 0                          | 0     | 0     | 1100  | 0     | 0              | 0     | 0     | 0     | 0     |
| ACA     | 6000                          | 2500  | 1700 | 1700  | 2000  | 7200           | 5500  | 1900  | 0     | 12600 | 0                          | 0     | 0     | 0     | 0     | 0              | 0     | 0     | 0     | 1200  |
| MPA     | 1800                          | 1100  | 0    | 0     | 1100  | 3700           | 1700  | 0     | 0     | 9200  | 0                          | 0     | 0     | 0     | 0     | 0              | 0     | 0     | 0     | 0     |
| HPA     | 0                             | 0     | 0    | 0     | 0     | 0              | 2300  | 0     | 0     | 0     | 0                          | 0     | 0     | 0     | 0     | 0              | 0     | 0     | 0     | 0     |
| VVA     | 0                             | 0     | 0    | 0     | 0     | 0              | 0     | 0     | 0     | 0     | 0                          | 0     | 0     | 0     | 0     | 0              | 0     | 0     | 0     | 0     |
| DBA     | 0                             | 0     | 0    | 0     | 0     | 0              | 5400  | 0     | 0     | 0     | 0                          | 0     | 0     | 0     | 0     | 0              | 0     | 0     | 0     | 0     |
| SBA     | 0                             | 0     | 0    | 0     | 0     | 1300           | 0     | 0     | 0     | 0     | 0                          | 0     | 0     | 0     | 0     | 0              | 0     | 0     | 0     | 0     |
| Calsepa | 4100                          | 6100  | 2500 | 700   | -1600 | 7200           | 10900 | 3600  | 2200  | -3700 | 6100                       | 6300  | 3400  | 11000 | 6300  | 5100           | 15900 | 4700  | 3000  | 5900  |
| PTL-I   | 0                             | 0     | 0    | 0     | 0     | 0              | 0     | 0     | 0     | 0     | 0                          | 0     | 0     | 0     | 0     | 0              | 0     | 0     | 0     | 0     |
| MAH     | 1200                          | 1000  | 0    | 1900  | 0     | 0              | 9200  | 1300  | 0     | 6600  | 0                          | 0     | 0     | 0     | 0     | 0              | 0     | 0     | 0     | 0     |
| WGA     | 14700                         | 10100 | 7100 | 8900  | 6800  | 17100          | 14600 | 11700 | 6000  | 17200 | 2900                       | 0     | 1900  | 8000  | 5100  | 1700           | 5900  | 5900  | 0     | 3900  |
| GSL-IA4 | 0                             | 0     | 0    | 0     | 0     | 0              | 0     | 0     | 0     | 0     | 0                          | 0     | 0     | 0     | 0     | 0              | 0     | 0     | 0     | 0     |
| GSL-IB4 | 0                             | 0     | 0    | 0     | 0     | 0              | 0     | 0     | 0     | 0     | 0                          | 0     | 0     | 0     | 0     | 0              | 0     | 0     | 0     | 0     |

The values were presented as the median after gain-merging. *p*-values in bold indicate statistical significance by Mann-Whitney U test.
